1 **Mechanistic Insights into Crosstalk of Tet(X) and MCR-1, Two Resistance**  
2 **Enzymes Co-produced by A Single Plasmid**

3

4

5 Yongchang Xu<sup>1</sup>, Lizhang Liu<sup>1</sup>, Huimin Zhang<sup>1,2</sup>, Youjun Feng<sup>1,3\*</sup>

6

7

8 1 Department of Pathogen Biology & Microbiology and Department of General  
9 Intensive Care Unit of the Second Affiliated Hospital, Zhejiang University  
10 School of Medicine, Hangzhou, Zhejiang 310058, China

11

12

13 2 Carl R. Woese Institute for Genomic Biology, University of Illinois at Urbana-  
14 Champaign, Urbana, IL 61801, USA

15

16

17 3 College of Animal Sciences, Zhejiang University, Hangzhou, Zhejiang  
18 310058, China

19

20

21

22

23

24

25 \*Corresponding author: Youjun Feng

26 Tel: 86-571-88208524; Fax: 86-571-88208524

27 E-mail: [fengyj@zju.edu.cn](mailto:fengyj@zju.edu.cn)

28

1 **Abstract**

2 Tigecycline and colistin are few of last-resort defenses used in anti-infection  
3 therapies against carbapenem-resistant bacterial pathogens. The successive  
4 emergence of plasmid-borne *tet(X)* tigecycline resistance mechanism and  
5 mobile colistin resistance (*mcr*) determinant, renders them clinically ineffective,  
6 posing a risky challenge to global public health. Here, we report that  
7 co-carriage of *tet(X6)* and *mcr-1* gives co-resistance to both classes of  
8 antibiotics by a single plasmid in *E. coli*. Genomic analysis suggested that  
9 transposal transfer of *mcr-1* proceeds into the plasmid pMS8345A, in which a  
10 new variant *tet(X6)* is neighbored with Class I integron. The structure-guided  
11 mutagenesis finely revealed the genetic determinants of Tet(X6) in the context  
12 of phenotypic tigecycline resistance. The combined evidence *in vitro* and *in*  
13 *vivo* demonstrated its enzymatic action of Tet(X6) in the destruction of  
14 tigecycline. The presence of Tet(X6) (and/or MCR-1) robustly prevents the  
15 accumulation of reactive oxygen species (ROS) induced by tigecycline (and/or  
16 colistin). Unlike that *mcr-1* exerts fitness cost in *E. coli*, *tet(X6)* does not. In the  
17 *tet(X6)*-positive strain that co-harbors *mcr-1*, tigecycline resistance is  
18 independently of colistin resistance caused by MCR-1-mediated lipid A  
19 remodeling, and vice versa. Co-production of Tet(X6) and MCR-1 gives no  
20 synergistic delayed growth of the recipient *E. coli*. Similar to that MCR-1  
21 behaves in the infection model of *G. mellonella*, Tet(X6) renders the treatment  
22 of tigecycline ineffective. Therefore, co-transfer of such two AMR genes is of  
23 great concern in the context of “one health” comprising  
24 environmental/animal/human sectors, and heightened efforts are required to  
25 monitor its dissemination.

26

27

28 **Keywords:** Tigecycline resistance; Tet(X); Tet(X6); Colistin resistance; *mcr-1*;  
29 Co-transfer

30

31 **Running title:** Crosstalk of Tet(X6) with MCR-1

32

1 **Author summary**

2 We report that *tet(X6)*, a new tigecycline resistance gene, is co-carried with the  
3 other resistance gene *mcr-1* by a single plasmid. Not only have we finely  
4 mapped genetic determinants of *tet(X6)*, but also revealed its biochemical  
5 action of tigecycline destruction. Crosstalk of Tet(X6) with MCR-1 is addressed.  
6 Tet(X6) tigecycline resistance is independently of MCR-1 colistin resistance,  
7 and vice versa. Similar to MCR-1 that renders colistin clinically ineffective,  
8 Tet(X6) leads to the failure of tigecycline treatment in the infection model of *G.*  
9 *mellonella*. This study extends mechanistic understanding mechanism and  
10 interplay of Tet(X6) and MCR-1, coproduced by a single plasmid. It also  
11 heightens the need to prevent rapid and large-scaled spread of AMR.  
12

## 1 Introduction

2 Antimicrobial resistance is an increasingly-devastating challenge in the  
3 context of “one health” that covers the environmental, animals and human  
4 sectors. Colistin is one of cationic antimicrobial polypeptides (CAMP) with an  
5 initial target of the surface-anchored lipid A moieties on the Gram-negative  
6 bacterium<sup>1</sup>. In contrast, tigecycline is the third-generation of tetracycline-type  
7 antibiotic, which interferes the machinery of protein synthesis of both  
8 Gram-negative, and Gram-positive bacteria<sup>2</sup>. In general, both colistin and  
9 tigecycline are an ultimate line of antibiotics to combat against lethal infections  
10 with carbapenem-resistant pathogens<sup>3,4</sup>. Unfortunately, the emergence and  
11 global distribution of MCR family of mobile colistin resistance (*mcr-1*<sup>5,6</sup> to  
12 *mcr-10*<sup>7</sup>) has potentially threatened the renewed interest of colistin in clinical  
13 therapies<sup>8</sup>. The majority of transferable colistin resistance depends on the  
14 surface lipid A remodeling by the MCR enzymes via the “ping-pong” trade-off<sup>9</sup>.

15  
16 In addition to the two well-known actions, efflux and ribosome protection  
17<sup>10,11</sup>, antibiotic degradation also constitutes in part the mechanism of  
18 tigecycline resistance<sup>12-14</sup>. The Tet(X) enzyme is a class of flavin-requiring  
19 monooxygenase<sup>15,16</sup>, which possesses the ability of modifying tetracycline  
20 and its derivatives (like the glycylcycline, tigecycline)<sup>13</sup>. In general, Tet(X)  
21 inactivates tigecycline to give 11a-Hydroxytigecycline, rendering the carrier  
22 host bacterium insusceptible to tigecycline<sup>13</sup>. In particular, functional  
23 meta-genomics of soils performed by Forsburg *et al.*<sup>17</sup> revealed a number of  
24 new tetracycline destructases (10 in total, namely Tet47 to Tet56). Among  
25 them, *tet56* is only one exclusively from the human pathogen *Legionella*  
26 *longbeachae*, indicating its potential spread from environments to clinical  
27 sector<sup>17</sup>. Subsequent structural studies suggested that these Tet tetracycline  
28 destructases accommodate antibiotics in diverse orientation, which highlights  
29 their architectural plasticity<sup>12</sup>. Indeed, the discovery of an inhibitor blocking the  
30 entry of flavin adenine dinucleotide cofactor into Tet(50) enzyme also paved a  
31 new way to reversing tigecycline resistance<sup>12</sup>.

32  
33 Very recently, two new variants [*tet(X4)* and *tet(X5)*] of *tet(X)*-type  
34 determinants that encode a tigecycline-inactivating enzyme, was found to  
35 spread by distinct plasmids of *Escherichia coli* in China<sup>18,19</sup>. Although the  
36 limited distribution of *tet(X4)* thus far<sup>20</sup>, it constitutes an expanding family of  
37 Tet(X) resistance enzyme [Tet(X)<sup>21,22</sup> to Tet(X5)<sup>19</sup>], and raises the possibility of  
38 rendering tigecycline (and even the newly-FDA approved eravacycline, the  
39 fourth-generation of tetracycline derivatives<sup>23</sup>) clinically ineffective.  
40 Worryingly, the co-transfer of *mcr-1* and *tet(X)* probably promotes the  
41 emergence of a deadly superbug with the co-resistance to polymyxin and  
42 tigecycline. However, this requires further epidemiological evidence.

1

2

3

4

5

6

Here, we report that this is the case. It underscores an urgent need to monitor and evaluate a potential risk for the convergence of Tet(X) tigecycline resistance to MCR colistin resistance by a single highly-transmissible plasmid in an epidemic ST95 lineage of virulent *E. coli*<sup>24</sup>.

## 1 **Results and Discussion**

### 2 **Discovery of *tet(X6)*, a new variant of Tet(X) resistance enzyme**

3 To address this hypothesis, we systematically screened the whole NCBI  
4 nucleotide database, in which each of the six known *tet(X)* variants [*tet(X)* to  
5 *tet(X5)*] acts as a query. Among them, it returned six hits with the significant  
6 score (97%-99% identity) when we used the *tet(X3)* of *Pseudomonas*  
7 *aeruginosa* (1137bp, Acc. no.: [AB097942](#)) as a searching probe. The resultant  
8 hits corresponded to four contigs of uncultured bacterium and two plasmids.  
9 These contigs include TE\_6F\_Contig\_7 (3328bp, Acc. no.: [KU547125](#)),  
10 TG\_6F\_Contig\_3 (3323bp, Acc. no.: [KU547130](#)), TG\_7F\_Contig\_3 (2575bp,  
11 Acc. no.: [KU547185](#)); and TE\_7F\_Contig\_3 (2588bp, Acc. no.: [KU547176](#)).  
12 The matched plasmids refer to pMS8345A (241,162bp; Acc. no.: [CP025402](#))<sup>24</sup>  
13 and p15C38-2 (150,745bp; Acc.no.: [LC501585](#)), in which the gene of  
14 MS8345\_A00031 exhibits 97.1% identity and 100% coverage when compared  
15 to *tet(X3)* (**Fig. S1**). This *tet(X3)*-like gene, MS8345\_A00031, is thereafter  
16 renamed *tet(X6)* (Acc. no.: [BK011183](#)) in this study (**Fig. 1A**). Strikingly, we  
17 found that this plasmid co-harbors the *mcr-1* gene encoding a  
18 phosphoethanolamine (PEA)-lipid A transferase<sup>25</sup>. Because that the plasmid  
19 is detected in an epidemic clone of ST95 Extraintestinal Pathogenic E. coli  
20 (ExPEC)<sup>24</sup>, this single plasmid pMS8345A possesses the potential to confer  
21 its recipient host *E. coli* the co-resistance to both tigecycline and colistin. It is  
22 unusual, but not without any precedent. In fact, *mcr-1* has ever coexist with  
23 *bla<sub>NDM</sub>* in a single isolate<sup>26</sup> and even a single plasmid<sup>27</sup>.

24

### 25 **Characterization of a *tet(X6)*-harboring plasmid**

26 The *tet(X6)*-positive pMS8345A (Acc. no.: [CP025402](#)) that attracts us  
27 much attention during the period of *in silico* search, is an IncHI2-type large  
28 plasmid (~241kb). In fact, it was initially discovered by Beatson and coworkers  
29<sup>24</sup> from a virulent lineage of *E. coli* with multiple drug resistance (MDR) through  
30 the routine screen of colistin resistance (**Fig. 1A**). Generally, this plasmid has  
31 an average GC% value of 46.29%, and is predicted to contain 548 putative  
32 open reading frames (ORFs). Importantly, pMS8345A is found to possess a  
33 series of Integrative and Conjugative Elements (ICEs) using the web-based  
34 tool of oriTfinder (**Fig. 1A**)<sup>28</sup>. Although that pMS8345A is not accessible in  
35 China right now, we applied its 2 surrogate plasmids, pHNSHP45 and pDJB-3  
36 (**Fig. 1A**), in the conjugation assays. In general consistency with an  
37 observation of Zhi *et al.*<sup>29</sup>, the efficiency of pHNSHP45-2 transfer is calculated  
38 to be  $3.7 \times 10^{-5}$  in our experiment of conjugations. In contrast, pDJB-3 can't  
39 survive in the conjugation trials. Unlike pDJB-3 that carries T4SS alone (**Fig.**  
40 **1A**), pHNSHP45-2 is fulfilled with all the four essential modules for  
41 self-transmission, namely *oriT* region, relaxase gene, type IV coupling protein  
42 (T4CP) gene and type IV secretion system (T4SS) (**Fig. 1B**). Notably, the

1    aforementioned modules are shared by the plasmid pM8345A and  
2    pHNSHP45-2 (**Fig. 1B**). Taken together, we believed that pM8345A is  
3    self-transmissible.

4

5           The hallmark of pMS8345A lies in two disconnected/unique resistance  
6    regions, one of which refers to the *tet(X6)*-bearing MDR region of appropriate  
7    ~40kb long (**Fig. 1B**), and the other denotes the *mcr-1*-containing region (**Fig.**  
8    **1C**). In total, 11 kinds of antimicrobial resistance (AMR) genes have been  
9    recruited and integrated into this unusual MDR region (**Fig. 1B**), giving multiple  
10   drug resistance. Apart from tigecycline resistance caused by *tet(X6)*, colistin  
11   resistance arises from the “*mcr-1-ISApl1*” transposon alone (**Fig. 1C**). It is  
12   reasonable to believe that the occupation of MDR (including, but not limited to  
13   the co-resistance to tigecycline and polymyxin, two last-resort anti-infection  
14   options) by pMS8345A can be a serious risk in the clinic sector, once it  
15   successfully enters and further disseminates across pathogenic species.

16

### 17    Genomic analyses of *tet(X6)*-containing MDR region

18           The linear genome alignment of MDR plasmids revealed that  
19    pMS8345A displays high level of similarity to at least three other resistance  
20    plasmids (**Fig. 1A**). Namely, they include i) the *mcr-1*-harboring plasmid  
21    pHNSHP45-2 with 99.75% identity and 87% query coverage (Acc. no.:  
22    [KU341381](#)), ii) and a tetracycline resistance plasmid of *Yersinia*  
23    *pseudotuberculosis*, pYps.F1 with 100% identity and 74% query coverage (Acc.  
24    no.: [LT221036](#)), and iii) a typical IncHI2-group, *mcr-1*-carrying plasmid pDJB-3  
25    with 99.74% identity and 63% query coverage (Acc. no.: [MK574666](#)). Unlike  
26    that the *mcr-1*-lacking plasmid pYps.F1 exists in *Y. pseudotuberculosis*, all the  
27    other three *mcr-1*-harboring plasmids disseminate in different clones of *E. coli*  
28    with varied sequence types (**Fig. 1A**). In brief, i) pMS8345A is detected in  
29    ST95, a globally-distributed clone having the relevance to bacterial  
30    bloodstream infections and neonatal meningitis<sup>24</sup>; ii) pHNSHP45-2 is  
31    recovered from an intensive pig farm<sup>29</sup>; and iii) pDJB-3 is recently determined  
32    by our group to occur in ST165 in an pig farm, a rare sequence type (**Fig. 1A**).

33

34           Among them, the organization of MDR differs greatly (**Fig. 1**). Unlike the  
35    pMS8345A having both *tet(X6)*-positive MDR (**Fig. 1B**), and the  
36    *mcr-1*-containing cassette (**Fig. 1C**), the plasmid pDJB-3 has *mcr-1*, but not  
37    MDR region (**Fig. 1A**). In contrast, the plasmid pYps.F1 carries the MDR  
38    region, but not *mcr-1* (**Fig. 1A**). Genetic analysis elucidated that three class I  
39    integrons are located in the MDR region. Given that a pool of gene cassettes  
40    can be integrated, the majority of which encode resistance to antibiotics<sup>30</sup>,  
41    Class I integron facilitates the global spread of AMRs<sup>31</sup>. In particular, the MDR  
42    region of pMS8345A seems structurally unusual (**Fig. 1B**). First, it comprises a



1 cluster of transposons and insert sequences (*IS*) with a boundary of two  
2 integrases (one is an integrase-encoding gene, *int1*, on the forward strand,  
3 and the other denotes a truncated version of *int1* on the reverse strand, **Fig.**  
4 **1B**); Second, *int1* is adjacent to an integron-associated recombination site *attI*,  
5 and then followed by several *attC* sites (**Fig. 1B**); Third, the occurrence of Tn2  
6 and TnAs1 (two copies of Tn3 family transposons) in the pMS8345A MDR  
7 region implies an association with its mobility (**Fig. 1B**); Fourth, the multiple *IS*  
8 elements located within the MDR region (namely *bla*<sub>CTX-M-1</sub> carried on an  
9 *ISEcp1*, the operon of *strA-strB* adjacent to an IS26-IS1133 structure<sup>32</sup>, the  
10 *aac(3)-IIa/tmrB* plus *bla*<sub>TEM-1B</sub> genes neighbored by IS26), facilitate the  
11 formation of transposons via the recombination events (**Fig. 1B**); Fifth, circular  
12 gene cassettes [such as *arr-2/ere(A)/aadA1*] are presumably integrated by  
13 site-specific recombination between *attI* and *attC*, a process mediated by the  
14 integron integrase (**Fig. 1B**). Along with class I integron (**Fig. 1B**), the fact that  
15 the GC content (37.8%) of *tet(X6)* is far less than the average GC% (46.29%)  
16 of the pMS8345A, allowed us to speculate that it is probably acquired via gene  
17 horizontal transfer. Sequence alignment reveals that the *tet(X6)*-positive MDR  
18 region in pMS8345A is highly similar to the MDR region in p15C38-2 (**Fig. 1B**).  
19 In brief, *tet(X6)* and *sul1* are downstream of a class 1 integron carrying the  
20 *aadA* family of resistance genes (*aadA22* in pMS8345A and *aadA12* in  
21 p15C38-2). p15C38-2 harbors a Tn3-like transposon, TnAs2 with 85% identity.  
22

### 23 **Functional insights into Tet(X6) tigecycline resistance**

24 In addition to the pMS8345A plasmid, the *tet(X6)*-based *in silico* search  
25 uncovers two more *tet(X6)*-containing contigs (**Fig. S2**), namely  
26 TG\_7F\_Contig\_3 (2575bp, Acc. no.: [KU547185](#)) and TE\_7F\_Contig\_3  
27 (2588bp, Acc. no.: [KU547176](#)). More intriguingly, the two contigs derive from  
28 uncultivated bacterium from latrine, in El Salvador, 2012 (**Fig. 2**). It seems  
29 likely that *tet(X6)* appears earlier than that of *tet(X4)* initially detected in a  
30 contig of *K. pneumoniae* (4069bp, Acc. no.: [NQBP01000050](#)) from Thailand,  
31 2015<sup>20</sup>. Further database mining suggests a number of *tet(X)* homologs  
32 [designated Tet(X7) to Tet(X13)] that are similar to *tet(X6)* at the identity  
33 ranging 91.27% to 97.62%. To relieve the confused nomenclature, we  
34 renamed the two redundant genes *tet(X5)* and *tet(X6)* appropriately (**Fig. 2**),  
35 which are chromosomally encoded in certain species like *Myroides*<sup>33</sup> and  
36 *Proteus*<sup>33-35</sup>. Different from the pMS8345A plasmid-borne *tet(X6)*, the  
37 designation of *tet(X6)* from four different species [*Proteus genomospecies* T60  
38 <sup>34</sup>, *P. cibarius* strain ZF2<sup>35</sup>, *Acinetobacter* (contig)<sup>33</sup> and *A. johnsonii* (contig)  
39 <sup>33</sup>] is identical to that of *tet(X12)* we proposed here. Accordingly, the  
40 pAB17H194-1 plasmid-encoding *tet(X5)* in *Acinetobacter pittii* strain  
41 AB17H194 (Acc. no.: [CP040912](#)) is relabeled with *tet(X14)*. The three  
42 inconsistent *tet(X6)* genes that arise separately from *P. cibarius* [contig, Acc.



1 no.: [WURM01000016](#)] *P. mirabilis* [contig, Acc. no.: [WURR01000048](#)], and *M.*  
2 *phaeus* [genome, Acc. no.: [CP047050](#)]<sup>33</sup>, were re-assigned with three distinct  
3 variants, namely *tet*(X15), *tet*(X16), and *tet*(X17). Phylogeny of these Tet(X)  
4 enzymes illustrates an ongoing Tet(X) family of resistance determinants (**Fig.**  
5 **2**), raising a possible ancestor shared amongst these *tet*(X) variants.

6  
7 Given that i) the statement by He *et al.*<sup>18</sup> that TetX3 of *Pseudomonas*  
8 (Acc. no.: [AB097942](#)) is not active, is argued by our recent study<sup>20</sup>; and ii) as a  
9 new variant, Tet(X6) displays 96.03% identity to the *Pseudomonas* Tet(X3)  
10 (**Fig. S3**), integrative evidences are highly demanded for the functional  
11 assignment of Tet(X6) in the context of tigecycline resistance. Therefore, we  
12 cloned *tet*(X6) into an arabinose-inducible pBAD24 expression vector and test  
13 its function in the strain MG1655 of *E. coli*. As predicted, the presence of *tet*(X6)  
14 can restore the growth of its recipient strain on LB agar plates with tigecycline  
15 (16 to 32µg/ml, **Fig. S4A**). This level of resistance is almost as same as *tet*(X3)  
16 does, but slightly lower than that of Tet(X4) (**Fig. S4A**). As predicted, structural  
17 modeling of Tet(X6) presents a substrate-loading channel (**Figs 3A-B**). Similar  
18 to the scenario with Tet(X4)<sup>20</sup>, it consists of a tigecycline substrate-binding  
19 motif (**Figs 3C and E**) and a FAD cofactor-occupied cavity (**Figs 3D and F**). As  
20 for Tet(X6), the substrate-binding requires the cooperation of five residues  
21 E182, R203, H224, G226 and M365 (**Table 1** and **Fig. 3E**). Similarly, the FAD  
22 cofactor is surrounded with the following six residues E36, R37, R107, D301,  
23 P308 and Q312 in Tet(X6) (**Table 1** and **Fig. 3F**). Except that the substitution  
24 of H224T occurs in Tet(X1) [and/or H234Y in Tet(X5), in **Fig. S3**], all the  
25 aforementioned residues are relatively-conserved across the newly-proposed  
26 family of Tet(X) tigecycline-inactivating enzymes (**Table 1**). Among them, a  
27 number of residues have been functionally verified. In the case of Tet(X4), two  
28 of 5 substrate-binding cavity (H231 and M372) and three of 6 FAD-interactive  
29 residues (E43, R114, and D308) somewhat play roles in the phenotypic  
30 tigecycline resistance<sup>20</sup>. Structure-guided alanine substitution of Tet(X6)  
31 revealed that i) two of 5 tigecycline-binding residues (H224A and M365A)  
32 partially determine its phenotypic resistance to tigecycline (**Fig. 3G**); and ii)  
33 three of 6 FAD-surrounding residues (E36A, R107A, and D301A) give  
34 differential level of impact on its resultant tigecycline resistance (**Fig. 3H**). Thus,  
35 this result represents a functional proof for Tet(X6) as a new member of the  
36 expanding family of Tet(X) enzymes that have a role in the action of tigecycline  
37 degradation.

### 38 39 **Action of inactivation of tigecycline by Tet(X6)**

40 To further elucidate biochemical mechanism of Tet(X6)-catalyzed  
41 tigecycline destruction (**Fig. 4**), we integrated an *in vivo* approach of microbial  
42 bioassay (**Fig. 4A**) with the *in vitro* system of enzymatic reaction (**Figs 4B-D**).

1 This tigecycline bioassay we developed is dependent on the indicator strain  
2 DH5 $\alpha$  of *E. coli* in that it was verified to be tigecycline susceptibility (**Fig. 4A**).  
3 As predicted, a zone of bacterial inhibition was clearly seen to surround a  
4 paper disk of the blank control, on which 2.5 $\mu$ g/ml tigecycline is spotted (**Fig.**  
5 **4A**). A similar scenario was also seen with the negative control, i.e., the  
6 supernatant from *E. coli* MG1655 having the empty vector pBAD24 alone (**Fig.**  
7 **4A and Table S1**). In contrast, the zone of tigecycline inhibition disappears  
8 around the paper disk containing supernatants of *E. coli* MG1655 expressing  
9 either *tet(X6)* or its homologous gene *tet(X3)* (**Fig. 4A**). This highlighted an *in*  
10 *vivo* role of *tet(X6)* [and/or *tet(X3)*] in the degradation of tigecycline.

11  
12 Subsequently, we produced the recombinant forms of Tet(X6) and its  
13 homolog Tet(X3) and examined their enzymatic activities *in vitro*. Notably,  
14 Tet(X6) and Tet(X3) protein consistently gives yellow in solution (**Figs 4B and**  
15 **5B**), hinting a possibility of being occupied with a FAD cofactor (**Fig. 5A**).  
16 Indeed, optical absorbance spectroscopy demonstrated the presence of  
17 Tet(X6)-bound FAD cofactor (**Figs 5A-B**). Gel filtration analysis indicated that  
18 both Tet(X6) and Tet(X3) display the solution structure of being a monomer  
19 (**Fig. 4B**). This generally agrees with the apparent molecular mass (~36kDa)  
20 seen in the SDS-PAGE (**Fig. 4B**). The identification of polypeptide fingerprint  
21 with liquid chromatography (LC)/mass spectrometry allowed us to further study  
22 the catalytic action of Tet(X6) [Tet(X3)] using the *in vitro* reconstituted system  
23 of tigecycline oxygenation (**Figs S5A-B**). As expected, LC/MS-based detection  
24 of the substrate tigecycline showed a unique peak at the position of 586.2 m/z  
25 (**Fig. 4C**). In particular, the reaction mixture of Tet(X6) [Tet(X3)] consistently  
26 gave two distinct peaks in the spectrum of LC/MS (**Figs 4D and S6**). Namely,  
27 they correspond to a peak of substrate tigecycline (586.2 m/z), and an  
28 additional peak assigned to its oxygenated product of tigecycline at the  
29 position of 602.2 m/z (**Figs 4D and S6**). Notably, the method of  
30 double-reciprocal plot (**Figs 5C-D**) was exploited to measure the kinetic  
31 parameters (**Fig. 5E**) of Tet(X6) enzyme for the reactant tigecycline. As a result,  
32  $K_m$  of Tet(X6) was calculated to be  $42.6 \pm 4.3$  (**Figs 5E-F**), which is comparable  
33 to those of Tet(X2), Tet(X4) and Tet(X5) (**Fig. 5F**). This finding is consistent  
34 with an observation with the newly-identified Tet(X4) by He and coauthors<sup>18</sup>.

35  
36 As Forsberg *et al.*<sup>17</sup> stated, similar scenarios were also seen with both  
37 Tet(X3) and Tet(X6) (**Fig. S7**), which is evidenced by the fact that liquid culture  
38 of *tet(X3)* [and/or *tet(X6)*]-bearing *E. coli* gives dark (**Fig. S7**). Unlike that the  
39 negative-control strain MG1655 with empty vector pBAD24 alone displays a  
40 big inhibition circle, E-test of tigecycline showed that expression of *tet(X3)* [or  
41 *tet(X6)*] renders the recipient strains significantly antagonistic to the tigecycline  
42 challenge (**Fig. S8**). Thereafter, we formulated a working model that Tet(X6)

1 exploits a FAD cofactor to oxygenate/destroy the last-line antibiotic tigecycline  
2 (Fig. 4E). It seems likely that this chemical reaction proceeds via a ‘ping-pong’  
3 action. However, this hypothesis requires further experimental evidence.

#### 4 5 Variation in the *mcr-1*-containing cassettes

6 Sequence analysis of *mcr-1*-bearing elements from the three  
7 IncHI2-type plasmids (pMS8345A, pSA186\_MCR1, and pDJB-3) reveals the  
8 core structure of “IS*Apl1*-*mcr-1*” (Fig. 1C). Unlike the plasmid of pDJB-3  
9 containing a cassette of “IS*Apl1*-*mcr-1*-*pap2*-IS*Apl1*”, the pSA186\_MCR1  
10 plasmid possesses an inactivated *pap2* inserted with an inverted copy of  
11 IS*Apl1* (Fig. 1C). As a member of the IS30 family, the IS*Apl1* can transpose  
12 into its target by formatting a synaptic complex between an inverted repeat (IR)  
13 in the transposon circle and an IR-like sequence in the target<sup>36</sup>. After the initial  
14 formation of this composite transposon, one or both copies of IS*Apl1* might be  
15 lost. As such, this loss might improve the stability of *mcr-1* in a diverse range of  
16 plasmids and then intensify its spread of *mcr-1*<sup>37</sup>. Therefore, we favor to  
17 believe this model that pMS8345A having “IS*Apl1*-*mcr-1*” alone (Fig. 1C)  
18 proceeds the loss of its downstream IS*Apl1* following the transposition. Not  
19 surprisingly, the *E. coli* strain carrying *mcr-1* gives the minimum inhibitory  
20 concentration (MIC) at 4.0 µg/ml. In addition, functional expression of a single  
21 *mcr-1* allows the polymyxin-susceptible recipient strain of *E. coli* MG1655 to  
22 appear on the LB agar plate with colistin of up to 16 µg/ml (Fig. S4B). Evidently,  
23 these data demonstrated that both *tet(X6)* and *mcr-1* are actively co-carried by  
24 a single plasmid in an epidemic ST95 clone of pathogenic *E. coli*.

#### 25 26 Physiological alteration by Tet(X6) and MCR-1

27 To address physiological consequence of Tet(X6) and MCR-1, we  
28 separately examined the pool of intracellular reactive oxygen species (ROS)  
29 and various growth curve-based metabolic fitness in an array of different *E.*  
30 *coli* strains (Figs 6 and 7A). As illustrated in the assay of fluorescence  
31 activated cell sorting (FACS), the cytosolic ROS level in the M1655 with empty  
32 vector alone was relatively low (Fig. 6A). Similar scenarios were also seen in  
33 derivatives of the MG1655 strain, regardless of the presence of *mcr-1* (Fig.  
34 6D), *tet(X6)* (Fig. 6E), and even both (Fig. 6F). As a consequence, the level of  
35 intracellular ROS was increased greatly upon its exposure to either colistin  
36 (Figs 6B and J) or tigecycline (Figs 6C and J). The expression of *mcr-1*  
37 effectively prevented the colistin-stimulated ROS formation (Figs 6G and J).  
38 Similarly, the presence of *tet(X6)* robustly interfered the ROS production  
39 triggered by tigecycline (Figs 6H and J). In fact, the addition of both colistin  
40 and tigecycline only gave slight increment of ROS accumulation in the  
41 MG1655 strain co-harboring *mcr-1* and *tet(X6)* (Figs 6I-K). Therefore, Tet(X6)

1 attenuates the tigecycline-induced ROS generation as does MCR-1 in  
2 response to colistin (**Fig. 6**).

3

4 As expected, the presence of plasmid-borne *mcr-1* can cause the  
5 delayed growth of its recipient host *E. coli* MG1655, whereas the empty vector  
6 not (**Figs 7B&D**). In agreement with earlier observations<sup>38-42</sup>, this underscored  
7 that MCR-1 exerts significantly fitness cost in *E. coli*. In contrast, the  
8 expression of *tet(X6)* fails to trigger any detectable retardation of bacterial  
9 growth (**Fig. 7C**), indicating that Tet(X6)-causing metabolic burden/disorder is  
10 minimal. To further probe whether or not the crosstalk between Tet(X6) and  
11 MCR-1 occurs in *E. coli*, we engineered an *E. coli* strain that coharbors  
12 derivatives of two compatible plasmids [one arises from a low copy number,  
13 lactose promoter-driven pWSK129<sup>43</sup>, and the other is constructed from an  
14 arabinose-inducible pBAD24 with ampicillin resistance<sup>44</sup>]. In fact, the two  
15 resistance enzymes MCR-1 and Tet(X6) are produced by lactose-inducible  
16 pWSK129::*mcr-1*, and arabinose-activating pBAD24::*tet(X6)*, respectively  
17 (**Table S1**). Evidently, the coexistence of *tet(X6)* and *mcr-1* cannot exert any  
18 synergism on bacterial retarded growth (**Fig. 7E**).

19

20 As recently performed with MCR-3/4, we also adopted an approach of  
21 LIVE/DEAD cell staining to analyze an array of engineered strains (**Fig. 8A**).  
22 Unlike that the negative control, MG1655 strains with vector alone are almost  
23 fulfilled with alive cells (**Figs 8B-C**), the *mcr-1*-producing strains contained  
24 around 30% dead cells (**Figs 8D-E, and J**). Consistent with that no retarded  
25 growth is associated with Tet(X6) (**Fig. 6C**), confocal microscopy assays  
26 illustrated that relatively-low level of DAED/LIVE ratio is present in the  
27 *tet(X6)*-carrying MG1655 (**Figs 8F-G, and J**). Not surprisingly, the  
28 co-expression of *mcr-1* and *tet(X6)* cannot promotes significant increment in  
29 the ratio of DEAD/LIVE cells (**Figs 8H-J**), when compared with the  
30 *mcr-1*-positive strains (**Figs 8D-E**). The remaining question to ask is whether  
31 or not Tet(X6) tigecycline resistance can crosstalk with MCR-1 colistin  
32 resistance in a given strain (**Fig. 9**). Thus, we designed such an *E. coli* strain  
33 FYJ4022 (**Table S1**), which co-harbors pWSK129::*mcr-1* and pBAD24::*tet(X6)*.  
34 In this engineered strain, the expression of *mcr-1* is turned on by the addition  
35 of lactose, and *tet(X6)* is finely tuned by the supplementation of arabinose (**Fig.**  
36 **9A**). The colistin resistance by MCR-1 was found to be independently of the  
37 presence of Tet(X6) (**Fig. 9B**), and vice versa (**Fig. 9C**). Further, MALDI-TOF  
38 mass spectrometry confirmed that the insusceptibility to polymyxin, arises from  
39 the PEA addition to lipid A by MCR-1, regardless of the presence of Tet(X6) in  
40 *E. coli* (**Figs 9D-E**).

41



1 Together, these data suggested that no synergism is detected in fitness  
2 costs caused by the lipid A modifier MCR-1 and the tigecycline-inactivating  
3 enzyme Tet(X6). Unlike that MCR-1 modifies bacterial lipid A, the initial target  
4 of the cationic antimicrobial peptide colistin receptor <sup>5</sup>, Tet(X6) hydrolyzes the  
5 family of tetracycline and its derivatives, like tigecycline (**Fig. 4**) <sup>15,20</sup>. The  
6 former action results in bacterial surface remodeling by MCR-1 through an  
7 addition of PEA moiety to 1(4')-phosphate position of lipid A <sup>8,9</sup>. Consequently,  
8 this might in part shape metabolic flux of the recipient microbe to balance  
9 *mcr-1* expression and bacterial survival stressed with colistin, producing the  
10 phenotypic fitness cost <sup>38</sup>. In contrast, it seems likely that the destruction of  
11 tigecycline by the flavin-dependent Tet(X) enzyme exerts minor effects on  
12 metabolic process (or claims few metabolic requirement). While such  
13 explanation for the limited fitness cost by Tet(X6) needs more experimental  
14 explorations.

15

### 16 **Inability of tigecycline to treat Tet(X)-producing *E. coli***

17 Since that Tet(X6) possesses the activity of oxygenating tetracycline  
18 (**Fig. S7**) and its derivative tigecycline (**Figs 3-4**), it is reasonable to anticipate  
19 it might interfere effectiveness of tigecycline in clinical sector. As very recently  
20 Song and coworkers <sup>45</sup> established in the case of *mcr-1*, we also adopted the  
21 infection model of *Galleria mellonella* (*G. mellonella*) to address this prediction  
22 (**Fig. 10A**). Given the constitutive expression of resistance enzymes in the  
23 recipient host, both *mcr-1* and *tet(X6)* were fused with the native promoters  
24 and then cloned into a low-copy vector of pWSK129 to give pWSK129::*Pmcr-1*  
25 and pWSK129::*P2tet(X6)*, respectively (**Table S1**). Subsequently, these two  
26 recombinant plasmids were separately engineered into the well-known virulent  
27 strain EDL933 of *E. coli* O157:H7, which generated strain FYJ4039 carrying  
28 pWSK129::*Pmcr-1* and strain FYJ4040 containing pWSK129::*P2tet(X6)* (**Table**  
29 **S1**). Unlike the negative control group that are consistently killed within 36 hrs  
30 after the treatment of PBS alone (**Fig. 10B**), 5 out of 8 larvae survived in the  
31 treatment of colistin (7.5mg/kg), 1h post-infection of virulent EDL933 strains  
32 (**Fig. 10B**). Notably, all the eight larvae were killed by the MCR-1-producing  
33 pathogenic strains of EDL933, regardless of colistin treatment (**Fig. 10B**). This  
34 revealed that *mcr-1* renders colistin inefficient in the infection model of *G.*  
35 *mellonella*. In fact, similar scenarios were observed with *mcr-1* in the infection  
36 models of *G. mellonella* <sup>45</sup> and mouse thighs <sup>27,45</sup>. As expected, the  
37 tigecycline-based therapy (4mg/kg) seemed effective in part (if not all),  
38 because that 6 of 8 larvae (75%) are alive within the whole monitoring period  
39 of 72hrs post-infection of virulent *E. coli* O157:H7 (**Fig. 10C**). Whereas in the  
40 negative control of PBS, none of larvae is exempt from the killing by the  
41 virulent strain EDL933 (**Fig. 10C**). Not surprisingly, nearly all the 8 infected *G.*  
42 *mellonella* still were dead, despite that they were treated with tigecycline (**Fig.**

1 **10C**). Consistent with that of *tet(X4)* reported by Sun *et al.*<sup>19</sup>, the observation  
2 also enabled us to believe that Tet(X6) abolishes clinical effectiveness of  
3 tigecycline. In summary, MCR-1 and Tet(X6) are posing challenges to the  
4 renewed interests of colistin and tigecycline, as two last-resort antibiotics used  
5 in clinical therapies against severe infections by pathogenic bacteria with  
6 multiple resistance.

## 1 **Conclusions**

2 The pMS8345A, a large IncHI2-type MDR-plasmid is firstly identified by  
3 Beatson and coworkers<sup>24</sup> to coexist with a big ColV-like virulence plasmid in  
4 the ST95 virulent lineage of *E. coli*. This alarms us that the spread of such  
5 pathogen might herald an era of post-antibiotic where we stand. The data we  
6 report here furthers our understanding tigeicycline resistance mechanism of  
7 TetX family enzymes (**Fig. 4E**). To the best of knowledge, it is a first report  
8 addressing a case of the co-transfer of *tet(X6)* and *mcr-1* by a single plasmid.  
9 Since that no known mobile elements are adjacent to *tet(X6)*, we hypothesize  
10 that the transposon of “*ISApI1-mcr-1-pap2-ISApI1*” mediates the transfer of  
11 *mcr-1* into this plasmid. The discovery of Tet(X6), a new member of Tet(X)  
12 family, allows us to engineer an array of Tet(X)-expressing bacteria, which  
13 paves a way to the development of bioremediation strategy for the  
14 environmental tetracycline contamination in the agricultural/industrial  
15 productions.

16  
17 Also, the co-carriage of *tet(X6)* and *mcr-1* on a single IncHI2-type  
18 plasmid is far different from the observation by Sun *et al.*<sup>19</sup> that the  
19 co-existence of *tet(X4)* and *mcr-1* is mediated by two distinct plasmids in an *E.*  
20 *coli* clone. Unlike that the mobility of *tet(X4)* relies on ISCR2-mediated  
21 transposition<sup>18</sup>, the gain of *tet(X6)* transferability is not clear (**Fig. 1B**). Not  
22 surprisingly, the IncHI2-type plasmid carries *mcr-1* along with *tet(X6)* here,  
23 because that it has ever been found to act as a vehicle of global *mcr-1*  
24 dissemination<sup>8,46</sup>. As expected, two types of different antibiotics (colistin and  
25 tigeicycline) consistently stimulate the formation of hydroxyl radicals in *E. coli*  
26 (esp. ROS, in **Fig. 6**), which might constitute an additional example and/or  
27 evidence for an improved postulate of “efficient antibiotic killing associated with  
28 bacterial metabolic state [ATP<sup>47-49</sup> and ROS<sup>50-53</sup>]. As for a given version of  
29 MCR resistance determinants<sup>39,41,42</sup>, the recipient bacterial host has been  
30 demonstrated to give fitness cost exemplified with the delayed growth prior to  
31 the entry into log-phase. It is reasonable that the presence of either *mcr-1* or  
32 *tet(X6)* also cause metabolic fitness to some extent. Consistent with scenarios  
33 with MCR-like members by Yang *et al.*<sup>38</sup> and Zhang *et al.*<sup>39,40,42</sup>, we verified  
34 the fitness cost caused by MCR-1 (**Figs 7-8**). This is in part (if not all)  
35 explained by the fact that bacterial membrane integrity is altered by  
36 MCR-1-mediated lipid A remodeling<sup>9</sup>. In contrast, the expression of *tet(X6)*  
37 does not lead to metabolic burden detected (**Figs 7-8**), which is probably  
38 because that Tet(X6) destructs the antibiotic of glycyI-cycline tigeicycline,  
39 rather than the ribosome target<sup>10</sup>. It is unusual, but not without any precedent.  
40 A similar scenario was seen with the other resistance enzyme  
41  $\beta$ -lactamase-encoding gene *bla*<sub>TEM1b</sub> (i.e., no fitness cost is correlated with it)  
42<sup>38</sup>. Therefore, we are not surprised with that no synergistic fitness arises from



1 the co-carriage of *tet(X6)* and *mcr-1* in *E. coli*. Although that a growing body of  
2 new *tet(X)* variants [*tet(X6)* to *tet(X17)*] have been proposed in this study (**Fig.**  
3 **2**), most members of this family, apart from *tet(X6)*, await experimental  
4 demonstration in the near future. This is because that rare case of cryptic  
5 version might occur naturally, such as the prototypical *tet(X)* [we called *tet(X0)*]  
6 preexisting in an obligate anaerobe *Bacteroides fragilis* <sup>21</sup>. Given that i)  
7 tigecycline and colistin both are one of few alternative options to combat  
8 against carbapenem-resistant Enterobacteriaceae and Acinetobacter species,  
9 ii) both MCR-1 <sup>6</sup> and Tet(X4) <sup>19</sup> have accordingly rendered colistin and  
10 tigecycline ineffective in the therapy of mice with MDR infection, the  
11 co-occurrence and co-transfer of *tet(X6)* and *mcr-1* by a single plasmid  
12 amongst epidemic pathogens is a risky challenge to public health and clinical  
13 therapies.

14

15 Taken together, it is plausible and urgent to introduce *mcr* variants along  
16 with, but not only limited to, *tet(X)* variants in the routine national (and/or  
17 international) investigation in the context of “one health”  
18 (environmental/animal/human sectors). Along with major findings of other  
19 research group <sup>12</sup>, functional definition of Tet(X3) and its homologue Tet(X6)  
20 here extends mechanistic insights into Tet(X) tigecycline resistance, and even  
21 benefit the development of anti-Tet(X) resistance enzyme inhibitors.

22

## 1 **Materials and Methods**

### 2 **Sequencing, assembly and annotation of plasmids**

3 The plasmid pDJB-3 was isolated from the colistin-resistant *E. coli*  
4 DJB-3 of swine origin, verified with *mcr-1*-specific PCR, and then subjected to  
5 genome sequencing with the HiSeq X ten PE150 sequencer platform (Illumina,  
6 USA). As a result, the DNA library of pDJB-3 plasmid prepared by KAPA Hyper  
7 Prep Kit (Roche, Basel, Switzerland) gave a pool of 150 bp paired-end reads  
8 that are destined to be assembled into a contig by the SPAdes Genome  
9 Assembler (version 3.11.0). A BLASTN search was conducted to probe  
10 whether or not the resultant *mcr-1*-containing contig has a best-hit plasmid  
11 candidate. Together with Sanger sequencing, PCR was applied to close all the  
12 suspected gaps.

13

14 The resultant plasmid genome was annotated through the prediction of  
15 open reading frames (ORFs) with RAST (rapid annotation using subsystem  
16 technology, <http://rast.nmpdr.org>). PlasmidFinder 1.3  
17 (<https://cge.cbs.dtu.dk/services/PlasmidFinder-1.3/>) was used to type the  
18 plasmid incompatibility, and ResFinder 3.1  
19 (<https://cge.cbs.dtu.dk/services/ResFinder/>) was applied to screen possible  
20 antimicrobial resistance genes. The plasmid map was given with GenomeVx  
21 (<http://wolfe.ucd.ie/GenomeVx/>), and its linear alignment was proceeded with  
22 Easyfig<sup>54</sup>.

23

### 24 **Plasmid conjugation experiments**

25 As recently described by Sun *et al.*<sup>27</sup>, the experiments of plasmid  
26 conjugation were performed, in which the rifampin-resistant *E. coli* recipient  
27 strain EC600 (and/or strain DJB-3) acted as a donor. In brief, overnight  
28 cultures were re-grew in LB broth, donor and recipient strains were mixed at  
29 the logarithmic phase and spotted on a filter membrane, and then incubated at  
30 37°C overnight. Subsequently, bacteria were washed from filter membrane  
31 and spotted on LB agar plate containing 400µg/ml rifampin and 4 µg/ml colistin  
32 for selection of transconjugants. The suspected transformants were validated  
33 with PCR assays.

34

### 35 **Molecular and microbial manipulations**

36 With all the known *tet(X)* variants [*tet(X0)*-*tet(X5)*] as queries, BLASTN  
37 was carried out. In particular, a *tet(X3)*-based search returned a plasmid  
38 pMS8345A with significant hit, leading to the discovery of new variant of  
39 *tet(X6)*. Then, *tet(X6)* was synthesized *in vitro*, and cloned into pABD24, giving  
40 pABD24::*tet(X6)* (**Table S1**). Following the verification of its identity with direct  
41 DNA sequencing, this recombinant plasmid was introduced into the MG1655  
42 strain of *E. coli* to assess its role *in vivo*. The generation of all the

1 point-mutants of *tet(X6)* were based on pBAD24::*tet(X6)* (Table S1) using  
2 site-directed mutagenesis kit (Vazyme Biotech), along with an array of specific  
3 primers (Table S2). To test relationship of MCR-1 with Tet(X6), *mcr-1* was  
4 cloned into pWSK129, giving pWSK::*mcr-1*, compatible with pBAD::*tet(X6)*  
5 within a single *E. coli* colony (Table S1). After experimental validations of  
6 phenotypic colistin resistance (and/or tigecycline resistance), all the bacterial  
7 were subjected to routine isolation of crude lipo-polysaccharides-lipid A as  
8 earlier recommended by Caroff *et al.*<sup>55</sup>. The identity of purified lipid A species  
9 were verified with MALDI-TOF/TOF mass spectrometry (Bruker UltrafleXtreme,  
10 Germany)<sup>25</sup>.

11  
12 As recently described with *tet(X4)*<sup>20</sup>, the ability of *tet(X6)* and *tet(X3)* in  
13 phenotypic tigecycline resistance was evaluated with LB agar plates  
14 containing tigecycline in a series of dilution. The strain expressing *tet(X4)* is  
15 used as a positive control. In addition, the MCR-1 colistin resistance was also  
16 judged as we earlier conducted with *mcr-1*<sup>56</sup> with little change. All the  
17 examined *E. coli* strains were cultivated at 37°C overnight. Overnight cultures  
18 were standardized to OD<sub>600</sub> 0.05, inoculated (1:10; v/v) into 96-well  
19 glass-bottomed plates in fresh LB broth ± arabinose or lactose (0, 0.02%, and  
20 0.2%, w/v), and shaken (180 r.p.m) at 37°C. Of note, arabinose acted as an  
21 inducer of pBAD24, and lactose was used to trigger expression of  
22 pWSK129-based MCR-1. As the establishment with NMCR-1<sup>39</sup> and MCR-3/5  
23<sup>41,42</sup>, bacterial growth curves were automatically plotted with  
24 spectrophotometer (Spectrum lab S32A) to evaluate the fitness cost caused by  
25 *tet(X6)* and *mcr-1*. During the total period of 20 hours, the value of optical  
26 absorbance (i.e., OD600) was consistently recorded at an interval of 1 hour.

27

### 28 Bioassays for tigecycline destruction

29 The hydrolytic activity of Tet(X6) [and/or Tet(X3)] enzyme was  
30 determined as Balouiri *et al.*<sup>57</sup> described with little change. In brief, the strain  
31 of MG1655 harboring pBAD24::*tet(X6)* [or pBAD24::*tet(X3)*] was cultivated  
32 overnight on LB agar plates supplemented with 0.1% arabinose. As a result,  
33 bacterial colonies stripped, were suspended with 0.5ml of LB broth containing  
34 0.1% arabinose and 2.5mg/ml tigecycline, whose optical density at 600nm  
35 (OD600) was adjusted to about 2.0. Then, the suspension cultures were  
36 proceeded to 8h stationary growth at 37°C. Following centrifugation  
37 (13,600rpm, 20min) and filtration (at 0.22µm cut-off), bacterial supernatants  
38 were prepared. The *E. coli* DH5α here referred to an indicator strain of  
39 tigecycline susceptibility. Of note, the overnight culture of *E. coli* DH5α (~100µl)  
40 was spread on a LB agar plate, which is centered with a paper disk of 6mm  
41 diameter. To visualize the inhibition zones, the supernatant of interest (~20µl)  
42 was spotted the paper disk on the aforementioned bioassay plates, and

1 incubated at 37°C for 16h. The negative-control denotes the supernatant from  
2 *E. coli* MG1655 bearing the empty vector pBAD24 (**Table S1**), and the blank  
3 control referred to the LB broth containing 2.5mg/ml tigecycline.

#### 4 5 **Expression, purification and identification of Tet(X) enzymes**

6 To produce the Tet(X6) protein and its homologue Tet(X3), the strains of  
7 *E. coli* BL21 carrying pET21::*tet*(X6) [and pET21::*tet*(X3)] were engineered  
8 (**Table S1**) for the inducible expression via the addition of 0.5 mM isopropyl  
9  $\beta$ -D-1-thiogalactopyranoside (IPTG). Bacterial lysates obtained by a French  
10 Press (JN-Mini, China), were subjected to 1h of centrifugation at 16,800 rpm at  
11 4°C, and the resultant supernatants were incubated with pre-equilibrated  
12 Ni-NTA agarose beads on ice for 3 hours. Following the removal of protein  
13 contaminants, the Tet(X6) [and/or Tet(X3)] protein was eluted from the Ni-NTA  
14 agarose beads using the elution buffer [20mM Tris-HCl (pH 8.0), 150mM NaCl,  
15 20mM imidazole, and 5% glycerol], and concentrated with a 30kDa cut-off  
16 ultra-filter (Millipore, USA). Subsequently, gel filtration was performed to probe  
17 solution structure of Tet(X6) [Tet(X3)], using a Superdex 200/300GL size  
18 exclusion column (GE Healthcare). The purity of protein pooled from the target  
19 peak was judged with SDS-PAGE (15%), and its identity was validated with  
20 MALDI-TOF/TOF mass spectrometry (LTQ orbitrap Elite, Thermo Fisher).

#### 21 22 **Enzymatic activity for Tet(X6) *in vitro***

23 To confirm the enzymatic activity of Tet(X6) enzyme, the *in vitro* reaction  
24 system was established as recently described by Sun *et al.*<sup>19</sup> with little change.  
25 The components of this assay (50 $\mu$ l in total) consisted of 20mM Tris (pH7.5),  
26 150mM NaCl, 1mM NADPH, 4mg/ml tigecycline, and the purified enzyme  
27 [2mg/ml for either Tet(X6) or Tet(X3)]. Following the maintenance (~12h) of  
28 enzymatic reaction at room temperature, the resultant reaction mixture was  
29 subjected to further analysis of liquid chromatography mass spectrometry  
30 (LC/MS) using an Agilent 6460 triple quadrupole mass spectrometer (Agilent  
31 Technologies, USA)<sup>18</sup>. As for LC/MS here, it was carried out as follows: i)  
32 Nitrogen acted as the sheath gas and drying gas, the nebulizer pressure was  
33 set to 45 psi, and the flow rate of drying gas was 5 liter/min. The flow rate and  
34 temperature of the sheath gas were 11 liter/min and 350°C, respectively; ii)  
35 Chromatographic separation proceeded on a Zorbax SB C8 column  
36 (150  $\times$  2.1mm, 3.5 $\mu$ m); iii) Mass spectrometric detection was completed using  
37 an electrospray ionization (ESI) source in positive mode. Scan range was  
38 100~1000amu; and iv) The resultant data was processed with Agilent Mass  
39 Hunter Workstation.

#### 40 41 **The steady state kinetic assay of Tet(X6)**

42 The decrease in absorbance corresponding to tigecycline hydroxylation

1 by Tet(X6) were monitored at 400nm ( $\epsilon_{400} = 4300 \text{ M}^{-1}\text{cm}^{-1}$ ) over 6 min. To  
2 determine the steady-state kinetics parameters for Tet(X6), we measured initial  
3 velocities ( $V_0$ ) of tigecycline inactivation at varied concentration of tigecycline  
4 (60 $\mu\text{M}$ , 80 $\mu\text{M}$ , 100 $\mu\text{M}$ , and 120 $\mu\text{M}$ ), 1mM NADPH, 5mM  $\text{MgCl}_2$ , 0.5 $\mu\text{M}$  Tet(X6)  
5 protein, 20mM Tris-HCl (pH8.5) concentrations at 37°C<sup>15</sup>. Each 200 $\mu\text{l}$  reaction  
6 in 96-well micro-titre was monitored using SPECTROstar<sup>Nano</sup>. All assays were  
7 performed in triplicate. Steady-state kinetic parameters were determined by  
8 fitting initial reaction rates ( $V_0$ ). The data was analyzed according to the  
9 standard Michaelis-Menten equation. The double-reciprocal plot featuring with  
10 the formula " $1/V_0 = (K_m/V_{\max})/[S] + 1/V_{\max}$ " was used to calculate the  $K_m$ .  
11 Accordingly,  $V_0 = V_{\max} [S]/(K_m + [S])$ . The catalytic constant  $k_{\text{cat}}$  was determined  
12 according to the  $V_{\max} = k_{\text{cat}} [E_0]$ , and  $E_0$  is total enzyme concentration<sup>58</sup>.

13

### 14 Flow cytometry

15 Mid-log phase cultures (OD600, ~1.0) were prepared for the detection  
16 of intra-cellular reactive oxygen species (ROS). The oxidant sensor dye,  
17 DCFH2-DA (sigma) was mixed with bacterial strains and kept for 0.5h.  
18 Accordingly, the 2.0mg/ml of antibiotics (colistin and/or tigecycline) were  
19 supplemented. Then, bacterial samples ( $10^5 \sim 10^6$ ) diluted with 0.85% saline  
20 were subjected to the analysis of flow cytometry<sup>40,42</sup>. The resultant FACS data  
21 was recorded with a BD FACSVerser flow cytometer through counting 10,000  
22 cells at a flow rate of 35ml/min (and/or 14ml/min). In particular, DCFH  
23 fluorescence was excited with a 488nm argon laser and emission was detected  
24 with the FL1 emission filter at 525nm using FL1 photomultiplier tub.

25

### 26 Confocal microscopy

27 As recently described<sup>38</sup>, confocal microscopy was conducted to  
28 examine the potential effects on bacterial viability exerted by resistance  
29 enzymes [MCR-1 and/or Tet(X6)]. Prior to assays of confocal microscopy,  
30 mid-log phase cultures were processed with the LIVE/DEAD BacLight<sup>TM</sup>  
31 Bacterial Viability Kit (Cat. No. L7012)<sup>38</sup>. Namely, the three strains tested here  
32 included i) *E. coli* MG1655 (*mcr-1/pWSK*), ii) MG1655 [*tet(X6)/pBAD*], and iii)  
33 MG1655 [*tet(X6)/pBAD* and *mcr-1/pWSK*]. Of note, 0.2% lactose is an inducer  
34 of *mcr-1* expression, and 0.2% arabinose acts as an activator for Tet(X6)  
35 enzyme production. After the removal of supernatants, bacterial biofilms were  
36 stained with 3% LIVE/DEAD kit solution, and maintained at room temperature  
37 in the dark for 15 minutes. Photographs were captured by the confocal laser  
38 scanning microscopy (Zeiss LSM 800) with a 63x oil immersion lens and  
39 analyzed using COMSTAT image analysis software. The Tukey–Kramer  
40 multiple comparison post hoc test was applied to judge the COMSTAT data.  
41 Statistical significance was set at  $p < 0.01$  with T-test.

42



## 1 Infection model of *G. mellonella*

2 To probe possible interferences of *mcr-1* and/or *tet(X6)* in the  
3 anti-bacterial treatment with colistin (and/or tigecycline), the infection model of  
4 *Galleria mellonella* (*G. mellonella*) was applied here. Prior to bacterial  
5 infections, the larvae of *G. mellonella* (Tianjin Huiyude Biotech Company,  
6 Tianjin, China) was assessed as for the weight (0.3-0.4g each) and its active  
7 status, and then grouped appropriately (8 per group). The mid-log phase  
8 cultures of the virulent *E. coli* (EHEC O157:H7) with or without plasmid-borne  
9 *mcr-1* [and/or *tet(X6)*] were prepared (**Table S1**), and then suspended with  
10 1xPBS buffer, in which the final OD600 is 0.1. As recently Song *et al.*  
11 performed<sup>45</sup> with minor change, each larvae was injected with 10ul of bacterial  
12 solution ( $1.0 \times 10^5$  cfu) at the left posterior gastropoda. After 1h post-challenge,  
13 the infected larvae separately received the different treatments on the right  
14 posterior gastropoda<sup>45</sup>. Namely, they referred to PBS, colistin (7.5mg/kg), and  
15 tigecycline (4mg/kg)<sup>45</sup>. Survival rate of *G. mellonella* was monitored over  
16 72hrs, of which an interval is 12hrs. Three biological replicates were  
17 performed.

18

## 19 Bioinformatics

20 Multiple sequence alignments of Tet(X) variants at the levels of both  
21 amino acids and nucleic acids proceeded with ClustalOmega  
22 (<https://www.ebi.ac.uk/Tools/msa/clustalo>). Consequently, the phylogeny of  
23 Tet(X) was generated with TreeView (<https://www.treeview.co.uk/>). Tet(X6) was  
24 structurally modeled using Swiss-Model  
25 (<https://swissmodel.expasy.org/interactive>)<sup>59</sup>, in which the structural template  
26 detected refers to Tet(X2) (PDB: 2Y6Q)<sup>16,58</sup>. Both GMQE (global model quality  
27 estimation) and QMEAN (a global and local absolute quality estimate on the  
28 modeled structure) was applied to judge the quality of the modeled structure.  
29 Finally, structural presentation and cavity illustration of Tet(X6) was given with  
30 PyMol (<https://pymol.org/2>).

31

## 32 Accession numbers

33 Nucleotide sequence data of *tet(X6)* reported here is available in the  
34 Third-Party Annotation Section of the DDBJ/ENA/GenBank databases under  
35 the accession number TPA: **BK011183**. The full genome sequence of the  
36 *mcr-1*-harboring plasmid pDJB-3 of swine origin is accessed under the  
37 accession number: **MK574666**.

38

1 **Acknowledgements**

2 We would like to thank Dr. Yuanyuan Zhang for the technical assistance  
3 in flow cytometer assays with BD FACSVerser (Shared Management Platform  
4 for Large Instrument, College of Animal Sciences, Zhejiang University). We are  
5 grateful to Prof. Jian-hua Liu (South China Agricultural University, Guangzhou,  
6 China) for providing us the *mcr-1*-harboring plasmid, pHNSHP45-2. This work  
7 was supported by National Key R&D Program of China (2017YFD0500202, YF)  
8 and National Natural Science Foundation of China (31830001, 31570027 &  
9 81772142, YF). Dr. Feng is a recipient of the national “Young 1000 Talents”  
10 Award of China.

11

12 **Author contributions**

13 YF designed and supervised this study; YF, YX, LL and HZ conducted  
14 experiments and analyzed data; YF and HZ contributed reagents and  
15 interpreted data; YF and HZ drafted and reviewed this manuscript.

16

17 **Competing Interests**

18 We declare that no conflict of interest is present.

19



## 1 **References**

- 2 1. Li, J. et al. Colistin: the re-emerging antibiotic for multidrug-resistant  
3 Gram-negative bacterial infections. *Lancet Infect Dis* **6**, 589-601 (2006).
- 4 2. Doan, T.L., Fung, H.B., Mehta, D. & Riska, P.F. Tigecycline: a glycyglycine  
5 antimicrobial agent. *Clin Ther* **28**, 1079-1106 (2006).
- 6 3. Noskin, G.A. Tigecycline: a new glycyglycine for treatment of serious  
7 infections. *Clin Infect Dis* **41 Suppl 5**, S303-14 (2005).
- 8 4. Feng, Y. Transferability of MCR-1/2 polymyxin resistance: Complex  
9 dissemination and genetic mechanism. *ACS Infect Dis* **4**, 291-300 (2018).
- 10 5. Gao, R. et al. Dissemination and mechanism for the MCR-1 colistin  
11 resistance. *PLoS Pathog* **12**, e1005957 (2016).
- 12 6. Liu, Y.Y. et al. Emergence of plasmid-mediated colistin resistance  
13 mechanism MCR-1 in animals and human beings in China: a  
14 microbiological and molecular biological study. *Lancet Infect Dis* **16**, 161-8  
15 (2016).
- 16 7. Wang, C. et al. Identification of novel mobile colistin resistance gene *mcr-10*.  
17 *Emerg Microbes Infect* **9**, 508-516 (2020).
- 18 8. Sun, J., Zhang, H., Liu, Y.H. & Feng, Y. Towards understanding MCR-like  
19 colistin resistance. *Trends Microbiol* **26**, 794-808 (2018).
- 20 9. Zhang, H., Srinivas, S., Xu, Y., Wei, W. & Feng, Y. Genetic and biochemical  
21 mechanisms for bacterial lipid A modifiers associated with polymyxin  
22 resistance. *Trends Biochem Sci* **44**, 973-988 (2019).
- 23 10. Nguyen, F. et al. Tetracycline antibiotics and resistance mechanisms. *Biol*  
24 *Chem* **395**, 559-75 (2014).
- 25 11. Li, W. et al. Mechanism of tetracycline resistance by ribosomal protection  
26 protein Tet(O). *Nat Commun* **4**, 1477 (2013).
- 27 12. Park, J. et al. Plasticity, dynamics, and inhibition of emerging tetracycline  
28 resistance enzymes. *Nat Chem Biol* **13**, 730-736 (2017).
- 29 13. Moore, I.F., Hughes, D.W. & Wright, G.D. Tigecycline is modified by the  
30 flavin-dependent monooxygenase TetX. *Biochemistry* **44**, 11829-35 (2005).
- 31 14. Thaker, M., Spanogiannopoulos, P. & Wright, G.D. The tetracycline  
32 resistome. *Cell Mol Life Sci* **67**, 419-31 (2010).
- 33 15. Yang, W. et al. TetX is a flavin-dependent monooxygenase conferring  
34 resistance to tetracycline antibiotics. *J Biol Chem* **279**, 52346-52 (2004).
- 35 16. Volkers, G., Palm, G.J., Weiss, M.S., Wright, G.D. & Hinrichs, W. Structural  
36 basis for a new tetracycline resistance mechanism relying on the TetX  
37 monooxygenase. *FEBS Lett* **585**, 1061-6 (2011).
- 38 17. Forsberg, K.J., Patel, S., Wencewicz, T.A. & Dantas, G. The tetracycline  
39 destructases: A novel family of tetracycline-inactivating enzymes. *Chem*  
40 *Biol* **22**, 888-97 (2015).
- 41 18. He, T. et al. Emergence of plasmid-mediated high-level tigecycline  
42 resistance genes in animals and humans. *Nat Microbiol* **4**, 1450-1456

- 1 (2019).
- 2 19. Sun, J. et al. Plasmid-encoded *tet(X)* genes that confer high-level tigecycline  
3 resistance in *Escherichia coli*. *Nat Microbiol* **4**, 1457-1464 (2019).
- 4 20. Xu, Y., Liu, L., Sun, J. & Feng, Y. Limited distribution and mechanism of the  
5 TetX4 tetracycline resistance enzyme. *Sci Bull (Beijing)* **64**, 1478-1481  
6 (2019).
- 7 21. Guiney, D.G., Jr, Hasegawa, P. & Davis, C.E. Expression in *Escherichia coli* of  
8 cryptic tetracycline resistance genes from *Bacteroides* R plasmids. *Plasmid*  
9 **11**, 248-52 (1984).
- 10 22. Speer, B.S., Bedzyk, L. & Salyers, A.A. Evidence that a novel tetracycline  
11 resistance gene found on two *Bacteroides* transposons encodes an  
12 NADP-requiring oxidoreductase. *J Bacteriol* **173**, 176-83 (1991).
- 13 23. Thakare, R., Dasgupta, A. & Chopra, S. Eravacycline for the treatment of  
14 patients with bacterial infections. *Drugs Today (Barc)* **54**, 245-254 (2018).
- 15 24. Forde, B.M. et al. Discovery of *mcr-1*-mediated colistin resistance in a  
16 highly virulent *Escherichia coli* lineage. *mSphere* **3**, pii: e00486-18 (2018).
- 17 25. Xu, Y., Lin, J., Cui, T., Srinivas, S. & Feng, Y. Mechanistic insights into  
18 transferable polymyxin resistance among gut bacteria. *J Biol Chem* **293**,  
19 4350-4365 (2018).
- 20 26. Mao, J. et al. Antibiotic exposure elicits the emergence of colistin- and  
21 carbapenem-resistant *Escherichia coli* coharboring MCR-1 and NDM-5 in a  
22 patient. *Virulence* **9**, 1001-1007 (2018).
- 23 27. Sun, J. et al. Co-transfer of *bla<sub>NDM-5</sub>* and *mcr-1* by an IncX3-X4 hybrid  
24 plasmid in *Escherichia coli*. *Nat Microbiol* **1**, 16176 (2016).
- 25 28. Li, X. et al. oriTfinder: a web-based tool for the identification of origin of  
26 transfers in DNA sequences of bacterial mobile genetic elements. *Nucleic*  
27 *Acids Res* **46**, W229-W234 (2018).
- 28 29. Zhi, C., Lv, L., Yu, L.F., Doi, Y. & Liu, J.H. Dissemination of the *mcr-1* colistin  
29 resistance gene. *Lancet Infect Dis* **16**, 292-3 (2016).
- 30 30. Gillings, M.R. Integrons: past, present, and future. *Microbiol Mol Biol Rev*  
31 **78**, 257-77 (2014).
- 32 31. Zhang, A.N. et al. Conserved phylogenetic distribution and limited  
33 antibiotic resistance of class 1 integrons revealed by assessing the  
34 bacterial genome and plasmid collection. *Microbiome* **6**, 130 (2018).
- 35 32. Chiou, C.S. & Jones, A.L. Nucleotide sequence analysis of a transposon  
36 (Tn5393) carrying streptomycin resistance genes in *Erwinia amylovora*  
37 and other gram-negative bacteria. *J Bacteriol* **175**, 732-40 (1993).
- 38 33. Liu, D. et al. Identification of the novel tigecycline resistance gene *tet(X6)*  
39 and its variants in *Myroides*, *Acinetobacter* and *Proteus* of food animal  
40 origin. *J Antimicrob Chemother* **75**, 1428-1431 (2020).
- 41 34. He, D. et al. A novel tigecycline resistance gene, *tet(X6)*, on an SXT/R391  
42 integrative and conjugative element in a *Proteus genomospecies* 6 isolate of

- 1 retail meat origin. *J Antimicrob Chemother* **75**, 1159-1164 (2020).
- 2 35. Peng, K., Li, R., He, T., Liu, Y. & Wang, Z. Characterization of a porcine  
3 *Proteus cibarius* strain co-harboring *tet(X6)* and *cfr*. *J Antimicrob*  
4 *Chemother* **75**, 1652-1654 (2020).
- 5 36. Wang, R. et al. The global distribution and spread of the mobilized colistin  
6 resistance gene *mcr-1*. *Nat Commun* **9**, 1179 (2018).
- 7 37. Snesrud, E. et al. A Model for Transposition of the Colistin Resistance Gene  
8 *mcr-1* by IS*Apl1*. *Antimicrob Agents Chemother* **60**, 6973-6976 (2016).
- 9 38. Yang, Q. et al. Balancing *mcr-1* expression and bacterial survival is a  
10 delicate equilibrium between essential cellular defence mechanisms. *Nat*  
11 *Commun* **8**, 2054 (2017).
- 12 39. Zhang, H., Wei, W., Huang, M., Umar, Z. & Feng, Y. Definition of a family of  
13 nonmobile colistin resistance (NMCR-1) determinants suggests aquatic  
14 reservoirs for MCR-4. *Adv Sci (Weinh)* **6**, 1900038 (2019).
- 15 40. Zhang, H. et al. Action and mechanism of the colistin resistance enzyme  
16 MCR-4. *Commun Biol* **2**, 36 (2019).
- 17 41. Xu, Y. et al. Spread of MCR-3 colistin resistance in China: An epidemiological,  
18 genomic and mechanistic study. *EBioMedicine* **34**, 139-157 (2018).
- 19 42. Zhang, H. et al. A genomic, evolutionary, and mechanistic study of MCR-5  
20 action suggests functional unification across the MCR family of colistin  
21 resistance. *Adv Sci (Weinh)* **6**, 1900034 (2019).
- 22 43. Wang, R.F. & Kushner, S.R. Construction of versatile low-copy-number  
23 vectors for cloning, sequencing and gene expression in *Escherichia coli*.  
24 *Gene* **100**, 195-9 (1991).
- 25 44. Khlebnikov, A., Risa, O., Skaug, T., Carrier, T.A. & Keasling, J.D. Regulatable  
26 arabinose-inducible gene expression system with consistent control in all  
27 cells of a culture. *J Bacteriol* **182**, 7029-34 (2000).
- 28 45. Song, M. et al. A broad-spectrum antibiotic adjuvant reverses  
29 multidrug-resistant Gram-negative pathogens. *Nat Microbiol*,  
30 <https://doi.org/10.1038/s41564-020-0723-z> (2020).
- 31 46. Wang, Q. et al. Complex dissemination of the diversified *mcr-1*-harbouring  
32 plasmids in *Escherichia coli* of different sequence types. *Oncotarget* **7**,  
33 82112-82122 (2016).
- 34 47. Stokes, J.M., Lopatkin, A.J., Lobritz, M.A. & Collins, J.J. Bacterial metabolism  
35 and antibiotic efficacy. *Cell Metab* **30**, 251-259 (2019).
- 36 48. Lopatkin, A.J. et al. Bacterial metabolic state more accurately predicts  
37 antibiotic lethality than growth rate. *Nat Microbiol* **4**, 2109-2117 (2019).
- 38 49. Belenky, P. et al. Bactericidal antibiotics induce toxic metabolic  
39 perturbations that lead to cellular damage. *Cell Rep* **13**, 968-80 (2015).
- 40 50. Lobritz, M.A. et al. Antibiotic efficacy is linked to bacterial cellular  
41 respiration. *Proc Natl Acad Sci U S A* **112**, 8173-80 (2015).
- 42 51. Kohanski, M.A., Dwyer, D.J., Hayete, B., Lawrence, C.A. & Collins, J.J. A

- 1 common mechanism of cellular death induced by bactericidal antibiotics.  
2 *Cell* **130**, 797-810 (2007).
- 3 52. Brynildsen, M.P., Winkler, J.A., Spina, C.S., MacDonald, I.C. & Collins, J.J.  
4 Potentiating antibacterial activity by predictably enhancing endogenous  
5 microbial ROS production. *Nat Biotechnol* **31**, 160-5 (2013).
- 6 53. Dwyer, D.J. et al. Antibiotics induce redox-related physiological alterations  
7 as part of their lethality. *Proc Natl Acad Sci U S A* **111**, E2100-9 (2014).
- 8 54. Sullivan, M.J., Petty, N.K. & Beatson, S.A. Easyfig: a genome comparison  
9 visualizer. *Bioinformatics* **27**, 1009-10 (2011).
- 10 55. Caroff, M., Tacken, A. & Szabo, L. Detergent-accelerated hydrolysis of  
11 bacterial endotoxins and determination of the anomeric configuration of  
12 the glycosyl phosphate present in the "isolated lipid A" fragment of the  
13 *Bordetella pertussis* endotoxin. *Carbohydr Res* **175**, 273-82 (1988).
- 14 56. Ye, H. et al. Diversified *mcr-1*-harbouring plasmid reservoirs confer  
15 resistance to colistin in human gut microbiota. *mBio* **7**, e00177 (2016).
- 16 57. Balouiri, M., Sadiki, M. & Ibnsouda, S.K. Methods for *in vitro* evaluating  
17 antimicrobial activity: A review. *J Pharm Anal* **6**, 71-79 (2016).
- 18 58. Walkiewicz, K. et al. Small changes in enzyme function can lead to  
19 surprisingly large fitness effects during adaptive evolution of antibiotic  
20 resistance. *Proc Natl Acad Sci U S A* **109**, 21408-13 (2012).
- 21 59. Biasini, M. et al. SWISS-MODEL: modelling protein tertiary and quaternary  
22 structure using evolutionary information. *Nucleic Acids Res* **42**, W252-8  
23 (2014).  
24

1 **Supporting information**

2

3 **Supporting tables**

4 **Table S1** Bacterial strains and plasmids used in this study

5 **Table S2** Primers used in this study

6

7 **Supporting figures**

8 **Fig. S1** Nucleotide acid sequence analysis of *tet(X3)* and *tet(X6)*

9 To determine the similarity between *tet(X3)* and *tet(X6)*, their nucleotide acid  
10 sequences were subjected to Clustal Omega  
11 (<https://www.ebi.ac.uk/Tools/msa/clustalo/>), and resultant form of sequence is  
12 given with ESPript 3.0 (<http://espript.ibcp.fr/ESPript/cgi-bin/ESPript.cgi>).  
13 Identical residues are in white letters with black background, and different  
14 residues are black letters with white background. The identity between *tet(X3)*  
15 and *tet(X6)* is 97.1%, with 31 substitution of 1137 residues in total.

16

17

18 **Fig. S2** Evidence that an intact *tet(X6)* is only harbored on one plasmid and  
19 two contigs thus far

20 Sequence alignment was conducted as described in **Fig. S1**.

21 An initial codon “ATG” and the stop codon “TAA” are underlined.

22

23

24 **Fig. S3** Sequence alignment of the Tet(X6) enzyme with other five homologs  
25 (X0 to X5)

26 Multiple sequence alignment was conducted with Clustal Omega  
27 (<https://www.ebi.ac.uk/Tools/msa/clustalo/>), generating its output with ESPript  
28 3.0 (<http://espript.ibcp.fr/ESPript/cgi-bin/ESPript.cgi>). The putative  
29 substrate-loading cavity is composed of FAD-interactive residues (with red  
30 triangles) and Tigecycline-binding residues (with blue triangles). Identical  
31 residues are indicated with white letters in red background.

32

33

34 **Fig. S4** Co-occurrence of *tet(X6)* and *mcr-1* gives co-resistance to colistin and  
35 tigecycline

36 **A.** Contrasting the level of tigecycline resistance by Tet(X) variants

37 The *E. coli* MG1655 carrying different variants of *tet(X)* [X3, X4, and X6] were  
38 maintained at 37°C on LB agar plates containing tigecycline in series of  
39 dilution.

40 **B.** The MCR-1 confers phenotypic colistin resistance in the *E. coli* MG1655

41

1 The derivatives of *E. coli* MG1655 bear *mcr-1* or *tet(X6)* alone (or both) were  
2 spotted on LB agar plates containing colistin in series of dilution and  
3 maintained at 37°C for overnight.

4

5

6 **Fig. S5 MS identity of the purified two proteins Tet(X3) and Tet(X6)**

7 **A.** MS-based identification of polypeptide fragments from the purified Tet(X3)  
8 protein

9 **B.** MS-based determination of the purified Tet(X6) protein

10 The underlined letters denote the polypeptides that match Tet(X3) [and/or  
11 Tet(X6)] protein.

12

13

14 **Fig. S6 Use of LC/MS to identify the oxygenated product of tigecycline by  
15 Tet(X3) enzyme**

16 In the spectrum, the peak of 586.2 (m/z) refers to tigecycline, whereas the  
17 other peak of 602.2 (m/z) denotes an oxygenated product of tigecycline.  
18 Chemical structures were given with ChemDraw.

19

20

21 **Fig. S7 Visualization for destruction of tetracycline by Tet(X3) [and Tet(X6)]  
22 enzyme**

23 Unlike the fact that the blank and the negative control (liquid culture of *E. coli*  
24 with empty vector alone) display yellow, bacterial culture of Tet(X3) [and/or  
25 Tet(X6)]-expressing *E. coli* gives dark. This indicates that the expression of  
26 Tet(X3) [and Tet(X6)] leads to the oxygenation of tetracycline, which is fully  
27 consistent with the observation of other tetracycline-inactivating enzymes by  
28 Forsberg and coworkers<sup>17</sup>.

29 0.1% arabinose is used to induce the expression of pBAD24-borne *tet(X3)*  
30 [and *tet(X6)*].

31 **Designation:** Blank, the LB liquid medium containing tetracycline; Vec,  
32 pBAD24.

33

34

35 **Fig. S8 Use of E-test to evaluate phenotypic growth of MG1655 strains  
36 expressing *tet(X3)/tet(X6)***

37 Semi-solid medium was poured, which was supplemented with the MG1655  
38 strains with the empty vector alone, or the plasmid-borne *tet(X3)* [and/or  
39 *tet(X6)*], accordingly. E-test strip is featuring with a gradient concentration of  
40 tigecycline. The cut-off value of tigecycline resistance is indicated with an  
41 arrow. A representative result of three independent experiments is given.

42



## 1 **Table 1** Substrate-loading cavities across Tet(X)-type enzymes

2

| Enzymes/Length     | Substrate-loading cavities |     |      |      |      |      |                                 |      |      |      |      |
|--------------------|----------------------------|-----|------|------|------|------|---------------------------------|------|------|------|------|
|                    | FAD-binding sites          |     |      |      |      |      | Tetracycline-recognizable sites |      |      |      |      |
| Tet(X0), 388aa     | E46                        | R47 | R117 | D311 | P318 | Q322 | Q192                            | R213 | H234 | G236 | M375 |
| Tet(X1), 379aa     | E36                        | R37 | R107 | D302 | P309 | Q313 | Q182                            | R203 | T224 | G226 | M366 |
| Tet(X2), 388aa     | E46                        | R47 | R117 | D311 | P318 | Q322 | Q192                            | R213 | H234 | G236 | M375 |
| Tet(X3), 378aa     | E36                        | R37 | R107 | D301 | P308 | Q312 | Q182                            | R203 | H224 | G226 | M365 |
| Tet(X4), 385aa     | E43                        | R44 | R114 | D308 | P315 | Q319 | Q189                            | R210 | H231 | G233 | M372 |
| Tet(X5), 386aa     | E46                        | R47 | R117 | D310 | P317 | Q321 | Q192                            | R213 | Y234 | G236 | M373 |
| Tet(X6), 378aa     | E36                        | R37 | R107 | D301 | P308 | Q312 | Q182                            | R203 | H224 | G226 | M365 |
| Tet(X7), 378aa     | E36                        | R37 | R107 | D301 | P308 | Q312 | Q182                            | R203 | H224 | G226 | M365 |
| Tet(X8), 378aa     | E36                        | R37 | R107 | D301 | P308 | Q312 | Q182                            | R203 | H224 | G226 | M365 |
| Tet(X9), 378aa     | E36                        | R37 | R107 | D301 | P308 | Q312 | Q182                            | R203 | H224 | G226 | M365 |
| Tet(X10), 387aa    | E45                        | R46 | R116 | D310 | P317 | Q321 | Q191                            | R212 | H233 | G235 | M374 |
| Tet(X11), 378aa    | E36                        | R37 | R107 | D301 | P308 | Q312 | Q182                            | R203 | H224 | G226 | M365 |
| Tet(X12), 387aa    | E45                        | R46 | R116 | D310 | P317 | Q321 | Q191                            | R212 | H233 | G235 | M374 |
| Tet(X13), 388aa    | E46                        | R47 | R117 | D310 | P317 | Q321 | Q192                            | R213 | H234 | G236 | M373 |
| Tet(X14) *, 388aa  | E46                        | R47 | R117 | D311 | P318 | Q322 | Q192                            | R213 | H234 | G236 | M375 |
| Tet(X15) *, 387aa  | E45                        | R46 | R116 | D310 | P317 | Q321 | Q191                            | R212 | H233 | G235 | M374 |
| Tet(X16) *, 387aa  | E45                        | R46 | R116 | D310 | P317 | Q321 | Q191                            | R212 | H233 | G235 | M374 |
| Tet(X17) *, 387aa  | E45                        | R46 | R116 | D310 | P317 | Q321 | Q191                            | R212 | H233 | G235 | M374 |
| Tet(X2/4)-P, 388aa | E46                        | R47 | R117 | D310 | P317 | Q321 | Q192                            | R213 | H234 | G236 | M373 |

3 The substituted residues are indicated in yellow background.

4 \*Tet(X14) is renamed from Tet(X5) of *Acinetobacter pittii* p13C018-1 [acc. no.:

5 [CP040912](#)]; Tet(X15) is relabeled from Tet(X6) of *Proteus cibarius* [acc. no.:

6 [WURM01000016](#)]; Tet(X16) replace the redundant Tet(X6) from *Proteus*

7 *mirabilis* [acc. no.: [WURR01000048](#)]; and Tet(X17) is corrected from Tet(X6) of

8 *Myroides phaeus* [acc. no.: [CP047050](#)].





1

2 As for this unique MDR region in pMS8345A, three Class 1 integrons are  
3 circled by dashed lines, 14 kinds of antibiotic resistance determinants like  
4 *addA1* (with red arrows), are integrated, and no less than 10 different mobile  
5 elements such as *ISEcp1* and *TnAs1* (indicated with yellow arrows) are  
6 determined. In particular, a new *tet(X)* variant of tigeicycline resistance  
7 enzymes, named *tet(X6)* (in bold red letters), is adjacent to *sul1* that conferring  
8 resistance to sulfonamide. Additionally, five *attL* sites (highlighted in purple)  
9 are detected. The gene environment of *tet(X6)* on pMS8345A is highly  
10 matched to the counterpart on plasmid p15C38-2, with an exception of a  
11 nucleotide deletion of “A” on the position of 287. This A287 deletion of *tet(X6)*  
12 highlighted with the symbol of “\*” results in a frameshift and premature  
13 termination of its corresponding ORF (1137bp vs 282bp; 378aa vs 93aa). In  
14 contrast, it gives limited overlap with the three *tet(X6)*-containing contigs, *P.*  
15 *aeruginosa* Pa-3 contig, TE\_7F\_Contig\_3, and TG\_7F\_Contig\_3.

16

17 **C.** Genetic context of the *mcr-1*-centering transposal region in pMS8345A,  
18 pHNSHP45-2, and pDJB-3

19

20 Colored arrows indicate ORFs and the shaded region depicts sequence  
21 similarity (70%-100%). The resistance genes are highlighted in red and mobile  
22 elements are highlighted in yellow.

23

24 **Designations:** pDJB-3 (156.5kb, IncHI2/*E. coli*, China/2017, Acc. no.:  
25 [MK574666](#)); pYps.F1 (200.66kb, IncH1/*Y. pseudotuberculosis*, France/2017,  
26 Acc. no.: [LT221036](#)); pHNSHP45-2 (251.5kb, IncHI2/*E. coli*, China/2013, Acc.  
27 no.: [KU341381](#)); p15C38-2 (150.745kb, IncA/C2, *E. coli*/Japan/2003, Acc. no.:  
28 [LC501585](#)); *Pseudomonas aeruginosa* strain Pa-3 contig (3.796kb,  
29 *P.aeruginosa*, Pakistan/2016, Acc. no.: [GCA\\_011947185.1](#)); Uncultured  
30 bacterium clone TE\_7F\_Contig\_3 (Acc. no.: [KU547176](#)); Uncultured  
31 bacterium clone TG\_7F\_Contig\_3 (Acc. no.: [KU547185](#)) and pMS8345A  
32 (241.162kb, IncHI2/*E. coli*, Qatar/2017, Acc. no.: [CP025402](#)).

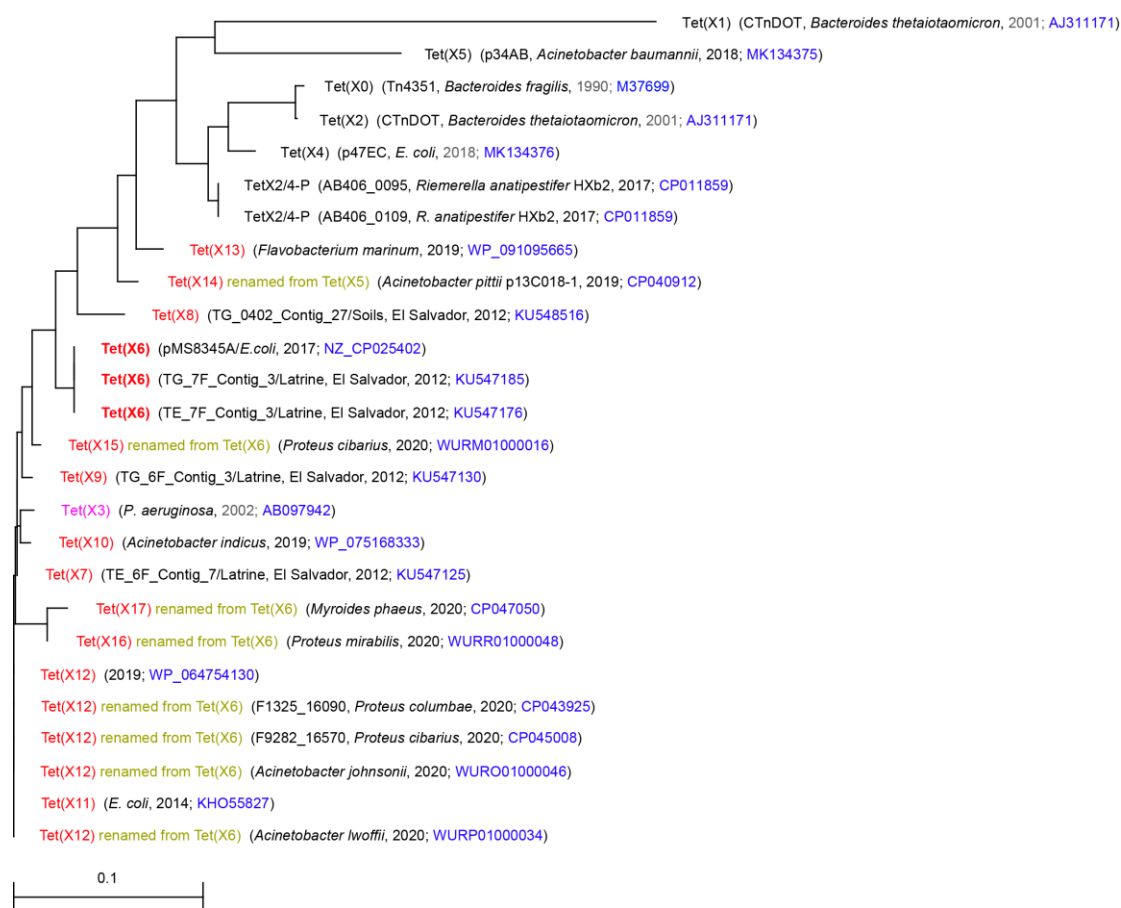

1  
2  
3  
4

## Figure 2 Phylogeny of Tet(X6)

The protein sequences of Tet(X) variants were selected from NCBI database, and the accession numbers were labeled accordingly on the graph. Clustal Omega (<https://www.ebi.ac.uk/Tools/msa/clustalo/>) was applied to generate the phylogenetic tree, whose final output is built with TreeView (<https://www.treeview.co.uk/>).

In addition to Tet(X3) (colored pink), all the twelve newly-renamed TetX variants (X6 to X17) are labeled in red. Besides the pMS8345A plasmid producing TetX6, two uncultured bacterium contigs (TE\_7F\_Contig\_3 and TG\_7F\_Contig\_3) from Latrine, El Salvador, were found to carry an intact version of *tet(X6)*. Of note, a number of *tet(X)* variants in duplicated and/or redundant nomenclature were corrected.

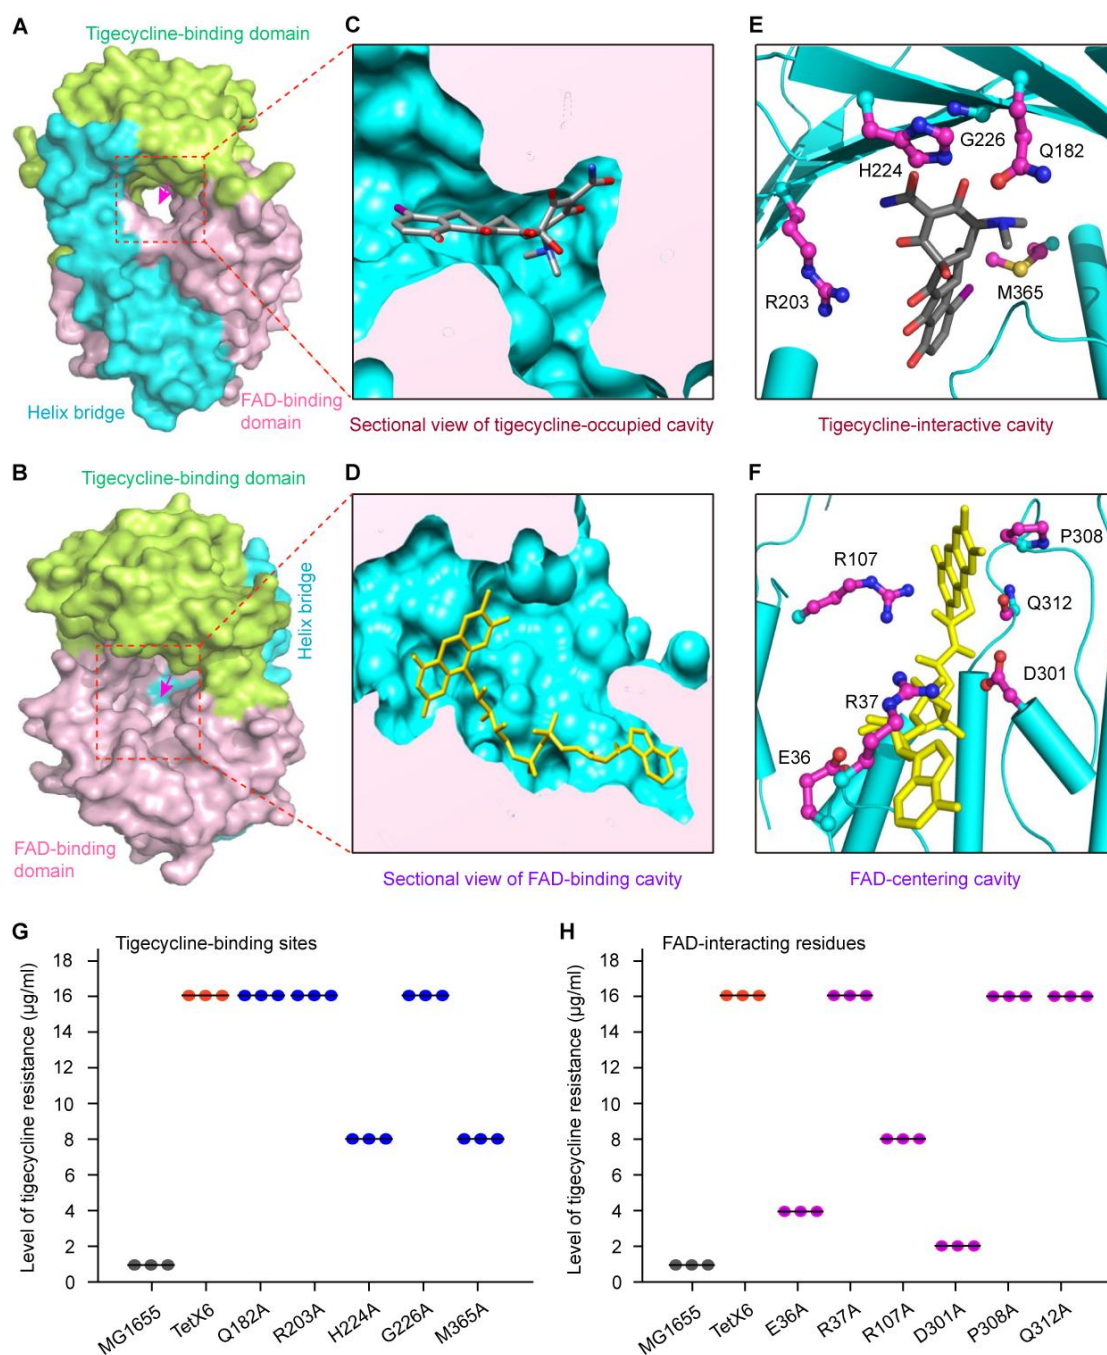

**Figure 3** Structural and functional analysis of the substrate tigecycline-loading tunnel in Tet(X6)

Surface structure of Tet(X6) with tigecycline-loading tunnel in the front view (**A**) and the rotated view (**B**).

The substrate-loading tunnel in open state is indicated with an arrow.

**C.** Sectional view of tigecycline-occupied cavity in Tet(X6) protein

**D.** Sectional view of FAD-binding cavity in Tet(X6) enzyme

**E.** An enlarged view of tigecycline-binding cavity in Tet(X6)

**F.** Structural snapshot of the FAD cofactor-binding motif in Tet(X6)

1 The critical residues are labeled. The molecule of tigecycline is colored in  
2 cherry red, and the FAD molecule is labeled in purple.  
3 **G.** Use of site-directed mutagenesis to assay the five tigecycline-binding  
4 residues in Tet(X6)  
5 **H.** Structure-guided alanine substitution analyses of FAD-interacting residues  
6 in Tet(X6)  
7  
8 Negative control is the *E. coli* MG1655 alone, and positive control refers to the  
9 MG1655 expressing the wild-type of *tet(X6)* (**Table S1**). The pBAD24-driven  
10 expression of Tet(X6) and its derivatives is triggered by the addition of 0.2%  
11 arabinose. Three independent assays were conducted, each of which is  
12 indicated with a dot.



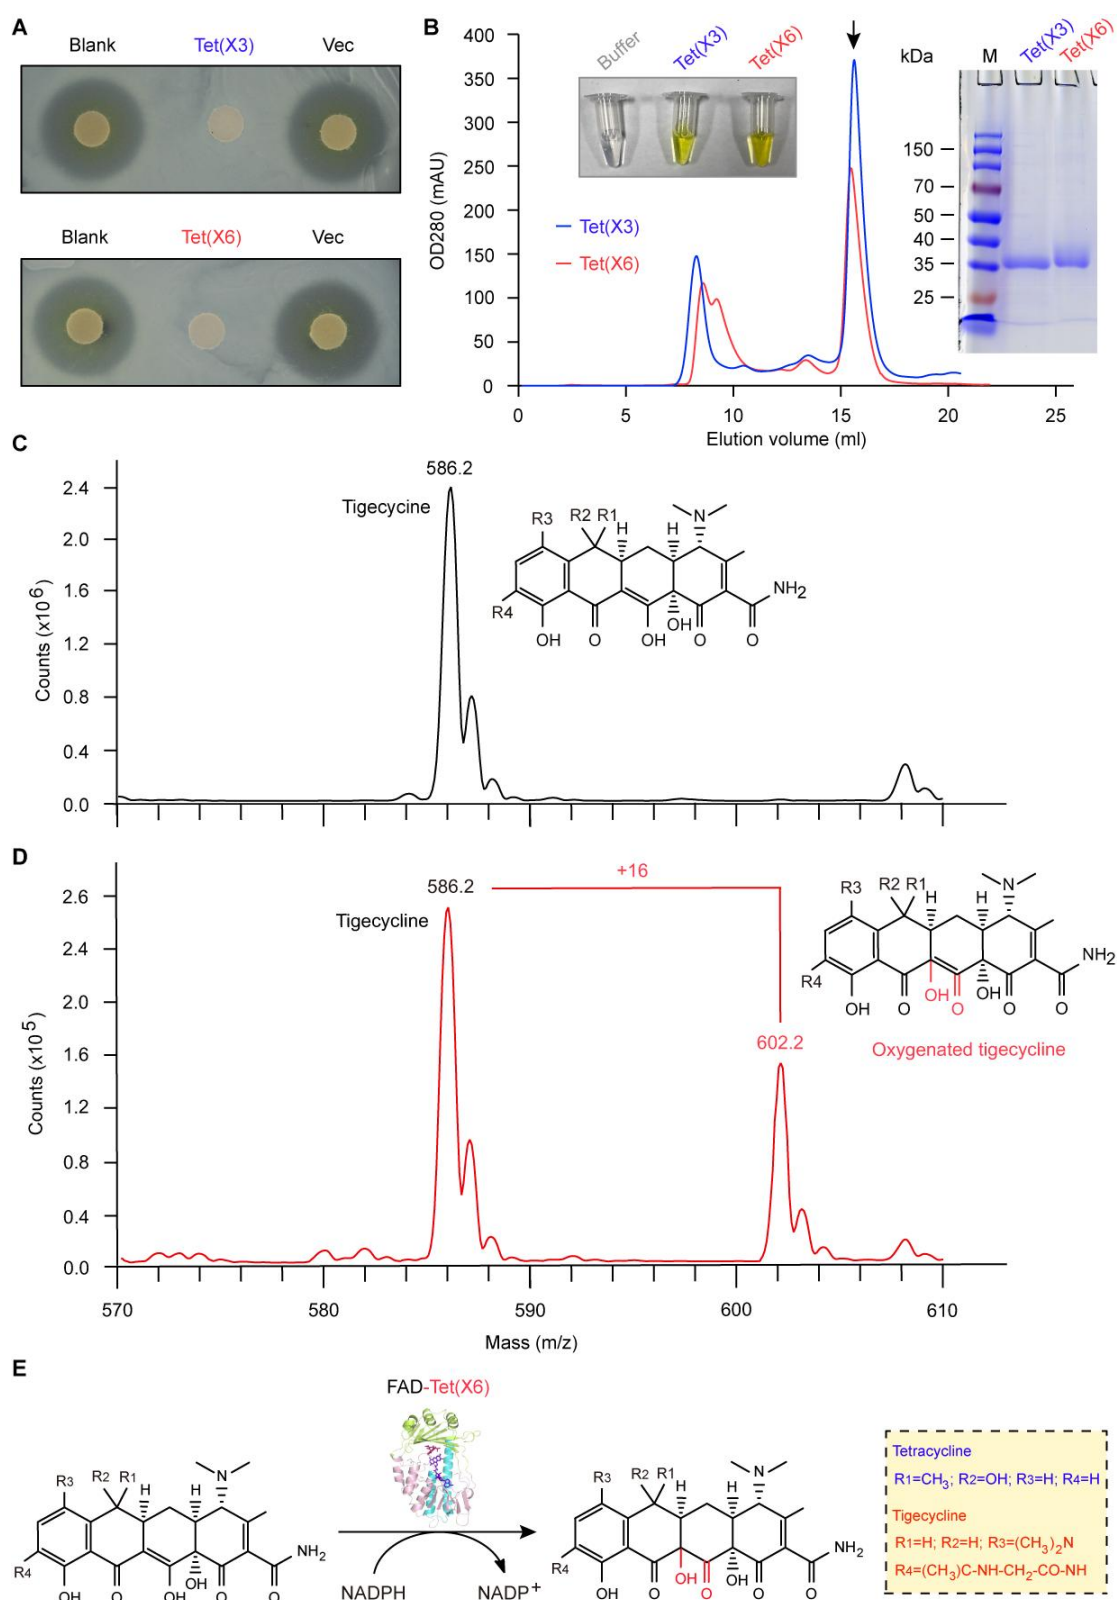

1

2 **Figure 4 Action and mechanism for Tet(X6) tigecycline resistance**

3 **A.** The bioassay for Tet(X6) [and Tet(X3)]-mediated destruction of tigecycline  
4 The presence of tigecycline on paper disks leads to the appearance of a  
5 transparent zone of microbial inhibition. In contrast, the inhibition zone is  
6 absent upon the destruction of tigecycline by Tet(X6) [and/or Tet(X3)].



1

2 **B.** Gel filtration analysis of the purified Tet(X6) resistance enzyme

3 To address the solution structure of Tet(X6) and Tet(X3), the method of size  
4 exclusion chromatography was applied. The protein samples were loaded into  
5 Superdex 200/300GL size exclusion column (GE Healthcare, USA). The  
6 eluted protein of interest (indicated with an arrow) is visualized in the  
7 right-hand inside gel (15% SDS-PAGE). The almost-identical elution volume  
8 (~16ml) of Tet(X6) and Tet(X3) is generally consistent with the apparent size of  
9 molecular weight ~36kDa in the inside PAGE gel, validating the monomeric  
10 form. Of note, the yellow color of Tet(X6) [Tet(X3)] solution is given in inside gel  
11 on the left hand, indicating the presence of a FAD cofactor-bound protein form.

12

13 LC/MS identification of tigecycline (**C**) and its oxygenated product by Tet(X6)  
14 enzyme (**D**)

15 Compared with the peak of tigecycline at 586.2 (m/z), the oxygenated  
16 derivative of tigecycline is reflected by a unique peak of 602.2 (m/z) in that it is  
17 added with an oxygen atom.

18

19 **E.** A chemical reaction model that Tet(X6) destructs/inactivates tigecycline

20

21 It was adapted appropriately from Xu *et al.*<sup>20</sup> with permission.

22 FAD-Tet(X6) denotes Tet(X6) enzyme in the form of binding FAD cofactor.

23 Chemical structures were given with ChemDraw.

24

25 **Designations:** blank, the LBA media with only tigecycline; vec, the vector of  
26 pET21a; LC/MS, liquid chromatography mass spectrometry; FAD, flavin  
27 adenine dinucleotide; NADP<sup>+</sup>, the oxidized form of nicotinamide adenine  
28 dinucleotide phosphate; NADPH, the reduced form of nicotinamide adenine  
29 dinucleotide phosphate.

30

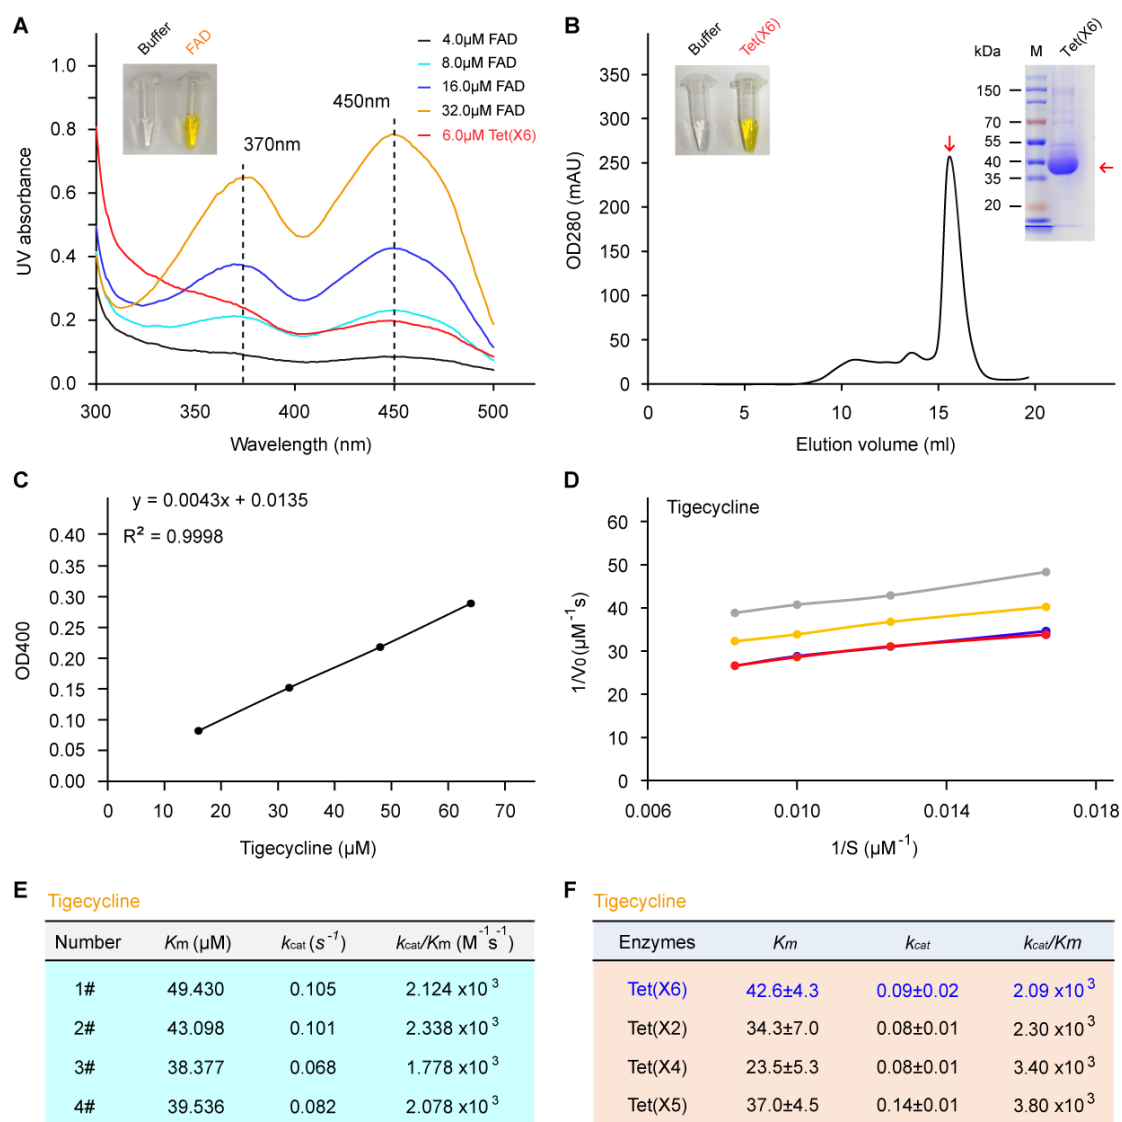

**Figure 5** Kinetic characteristics of Tet(X6) enzyme

**A.** Use of optical absorbance spectroscopy to detect the Tet(X6)-bound FAD cofactor

The FAD solution (positive control) with yellow color (inside gel), features with two unique peaks at the wave-lengths of 370nm and 450nm. A similar scenario was also seen with the sample of Tet(X6) protein.

**B.** Purity of the recombinant Tet(X6) protein judged with gel filtration

The purified protein of Tet(X6) with the yellow color (inside gel on left hand), was separated with 15% SDS-PAGE (inside gel on right hand). The gel filtration was developed with the Superdex 200 column run on AKTA Pure.

**C.** The standard curve of absorption of tigecycline at the wavelength of 400nm. The slope of the line is described the symbol “ε”. As for tigecycline, ε<sub>400</sub>=4300 M<sup>-1</sup> cm<sup>-1</sup>.

Use of double-reciprocal plot (**D**) to measure the kinetic parameters (**E**) of

1 Tet(X6) enzyme  
2 Four independent experiments were conducted to generate the above  
3 double-reciprocal plots, giving kinetic parameters.  
4 **F.** Kinetic constant of Tet(X6) is comparable with the counterpart of the other  
5 three known Tet(X) enzymes, namely Tet(X2), Tet(X4) and Tet(X5)  
6 The value of Tet(X6) arising from the data (**panel D**) are expressed in  
7 averages $\pm$ SD. All the values of other three enzymes were reported by He and  
8 coworkers<sup>18</sup>.  
9 **Designations:**  $K_m$ , Michaelis-Menten constant;  $V_{max}$ , the maximum velocity of  
10 enzymatic reaction;  $K_{cat}$ , catalytic constant;  $V_0$ , the initial velocity; SD, standard  
11 deviation.  
12

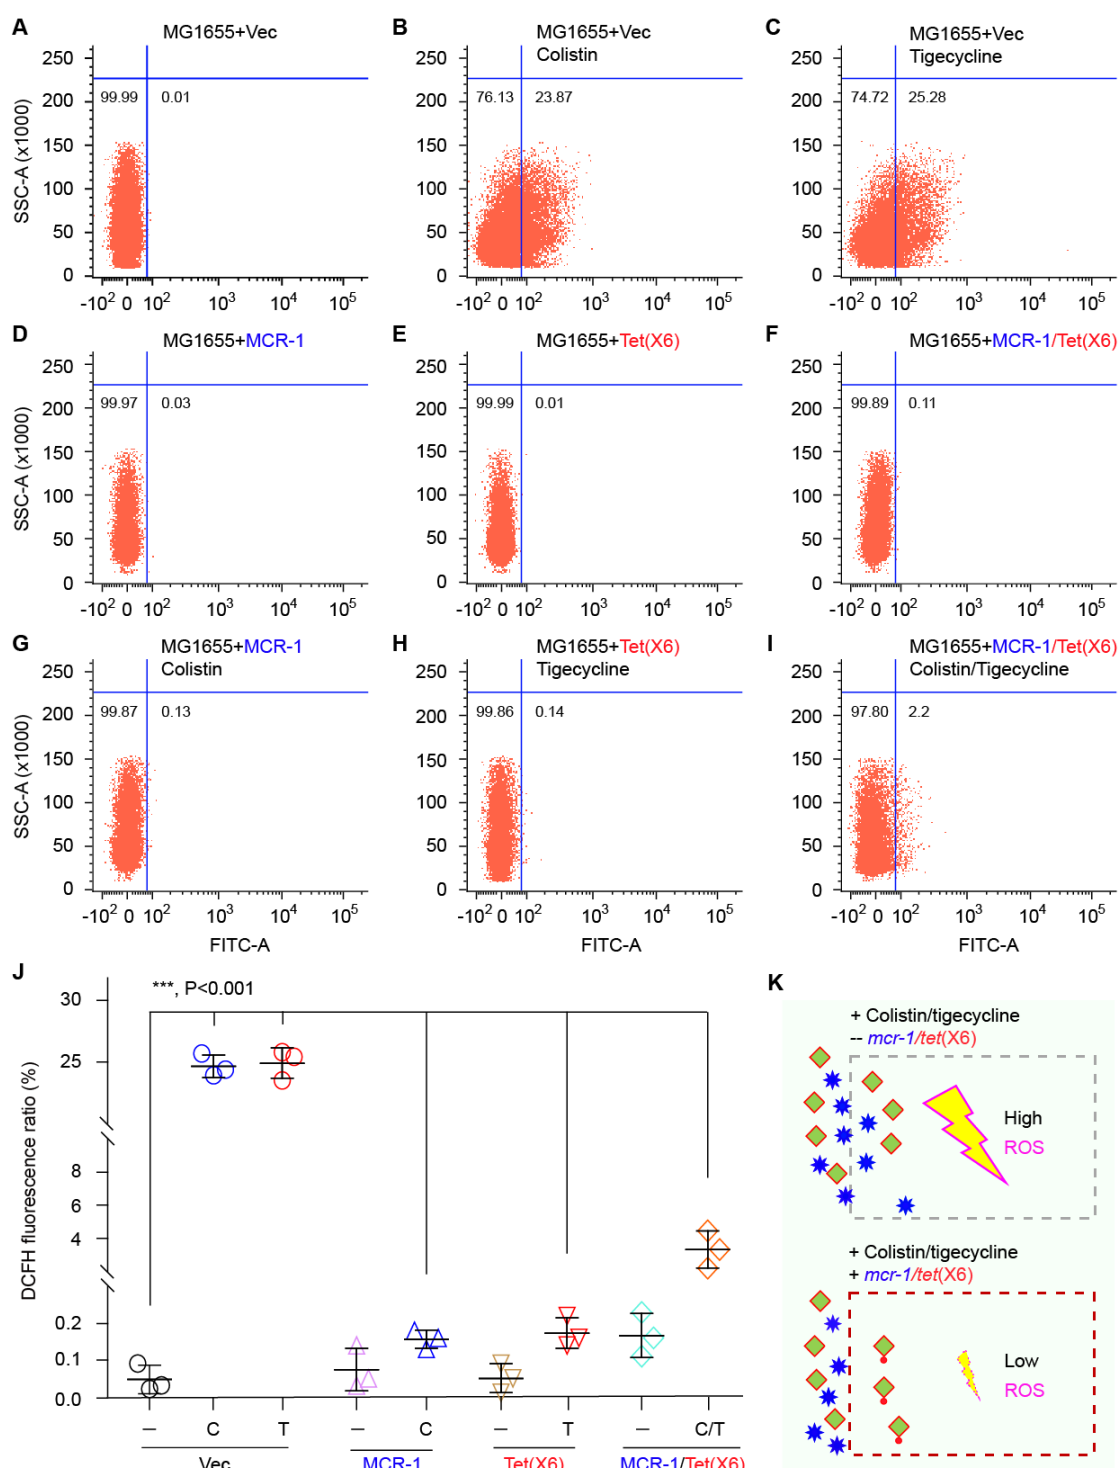

1

2 **Figure 6** Use of flow cytometry to measure intracellular ROS level induced by  
3 colistin and/or tigecycline

4

5 **A.** FACS analysis of basal level of ROS in the negative strain *E. coli* MG1655  
6 with empty vector alone

7 Intracellular ROS level is boosted upon the addition of either colistin (**B**) or  
8 tigecycline (**C**) into the MG1655 strain

9 Cytosolic ROS level of the MG1655 strains expressing *mcr-1* (**D**) or *tet(X6)* (**E**)

1 **F.** Determination of ROS level in the MG1655 carrying both *mcr-1* and *tet(X6)*

2 **G.** Colistin cannot stimulate the ROS production in the MG1655 strain  
3 expressing *mcr-1*

4 **H.** Tigecycline cannot activates the ROS production in the MG1655 strain  
5 expressing *tet(X6)*

6 **I.** The mixture of tigecycline and colistin cannot significantly alter the cytosolic  
7 ROS accumulation in the MG1655 strain co-harboring *mcr-1* and *tet(X6)*

8 **J.** Flow cytometry-based determination of relative level of intracellular ROS in  
9 different *E. coli* MG1655 strains in response to colistin and/or tigecycline  
10 Along with Tukey-Kramer multiple comparisons post-test, the data is given  
11 using one-way analysis of variance (ANOVA). \*p-value is less than 0.001.

12

13 **K.** A scheme for colistin/tigecycline-induced accumulation of ROS, and its  
14 interfered formation by MCR-1/Tet(X6)

15 Blue asterisk denotes colistin, and green square refers to tigecycline. The  
16 oxygenated form of tigecycline is indicated with green square attached with a  
17 red dot. The reactive oxygen species (ROS) are illustrated with the symbols of  
18 lightning.

19 As for the induction of ROS, the two antibiotics used here denoted 0.2mg/ml  
20 colistin and 0.2mg/ml tigecycline.

21 **Abbreviations:** FACS, fluorescence activated cell sorting; ROS, reactivated  
22 oxygen species.

23

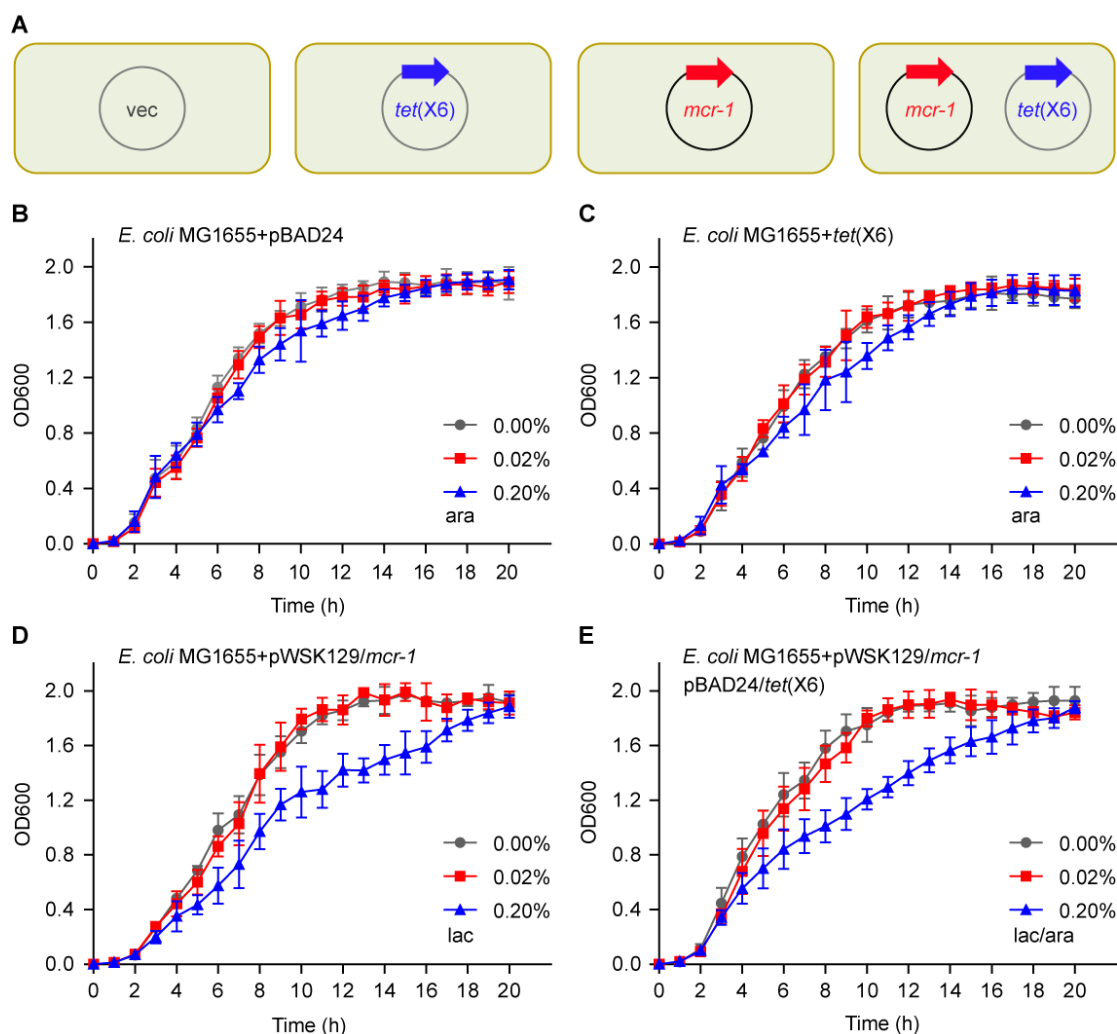

1  
2  
3  
4  
5  
6  
7  
8  
9  
10  
11  
12  
13  
14  
15  
16  
17

**Figure 7** Use of growth curves to monitor metabolic fitness caused by *mcr-1* and *tet(X6)* in *E. coli*

**A.** Schematic representative of various *E. coli* strains carrying plasmid-borne *tet(X6)*, *mcr-1* or both

**B.** The empty vector exerts no effect on bacterial growth of the *E. coli* MG1655

**C.** Expression of *tet(X6)* causes slightly the delayed growth of the *E. coli* MG1655

**D.** Expression of *mcr-1* gives significantly metabolic fitness in its recipient host *E. coli* MG1655 slightly the delayed growth of the *E. coli* MG1655

**E.** Co-expression of *mcr-1* and *tet(X6)* cannot lead to synergistic fitness cost of the recipient strain

The data was given in means  $\pm$  SD from three independent plotting of growth curves. vec, pBAD24.



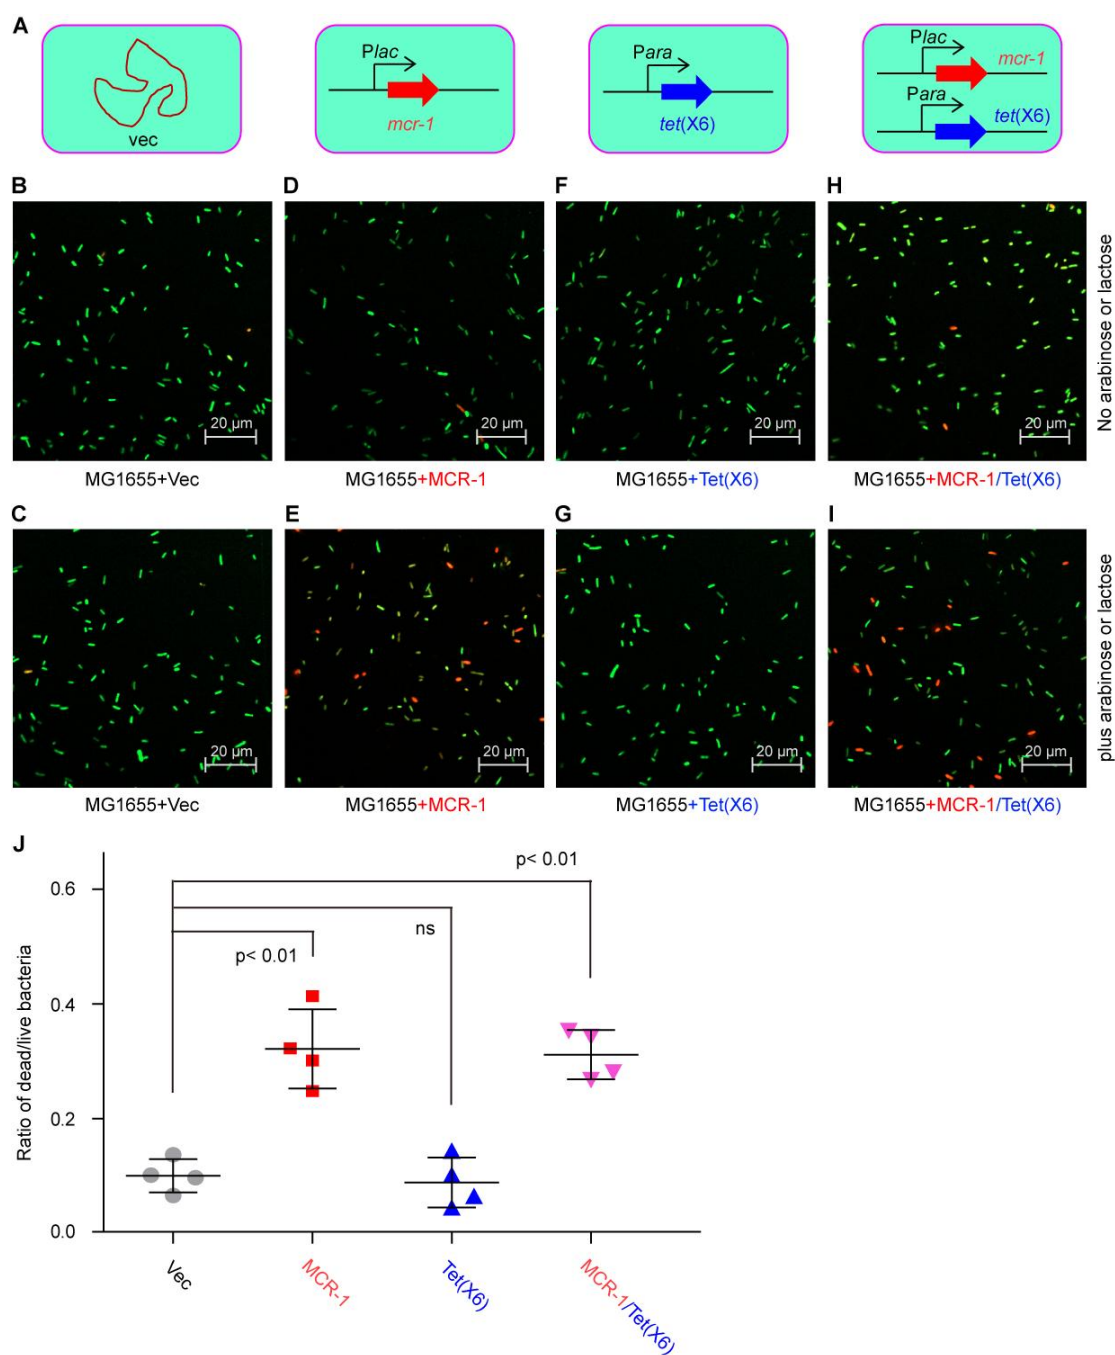

1  
2 **Figure 8** Confocal microscopy-based visualization for bacterial fitness cost  
3 caused by functional expression of *tet(X6)* (and/or *mcr-1*) in *E. coli*  
4  
5 **A.** Scheme for engineered strains of *E. coli* with inducible expression of *tet(X6)*,  
6 *mcr-1*, or both  
7 **B&C** Bacterial viability of the negative control strains, *E. coli* MG1655 with the  
8 empty vector alone is not affected by the presence of the inducer arabinose  
9 and/or lactose  
10 **D&E** The ratio of DEAD/LIVE cells suggests that arabinose-induced  
11 expression of *mcr-1* gives appreciable level of fitness cost in *E. coli*

1 **F&G** Regardless of the inducer lactose added, the MG1655 strains harboring  
2 *tetX6* is indistinguishable, when compared with those of negative control  
3 strains  
4 **H.** The *mcr-1* and *tet(X6)*-coharboring MG1655 does not display the  
5 phenotypic fitness cost, without the addition of neither arabinose nor lactose  
6 **I.** The co-expression of MCR-1 and Tet(X6) cannot exert synergistic effect of  
7 metabolic fitness  
8 **J.** Bacterial viability-based measurement of bacterial fitness costs in various  
9 MG1655 strains bearing either *mcr-1* or *tet(X6)* (or both)  
10 Bacterial viability was determined through cell staining with LIVE/DEAD kit,  
11 which is followed by imaging with confocal laser scanning microscopy. The  
12 color of green and red separately denotes alive and dead cells.  
13 Data was collected from four independent trials and evaluated using one-way  
14 analysis of variance (ANOVA) followed by Tukey–Kramer multiple  
15 comparisons post hoc test. \*\*p-value is less than 0.01. ns, no significance.  
16

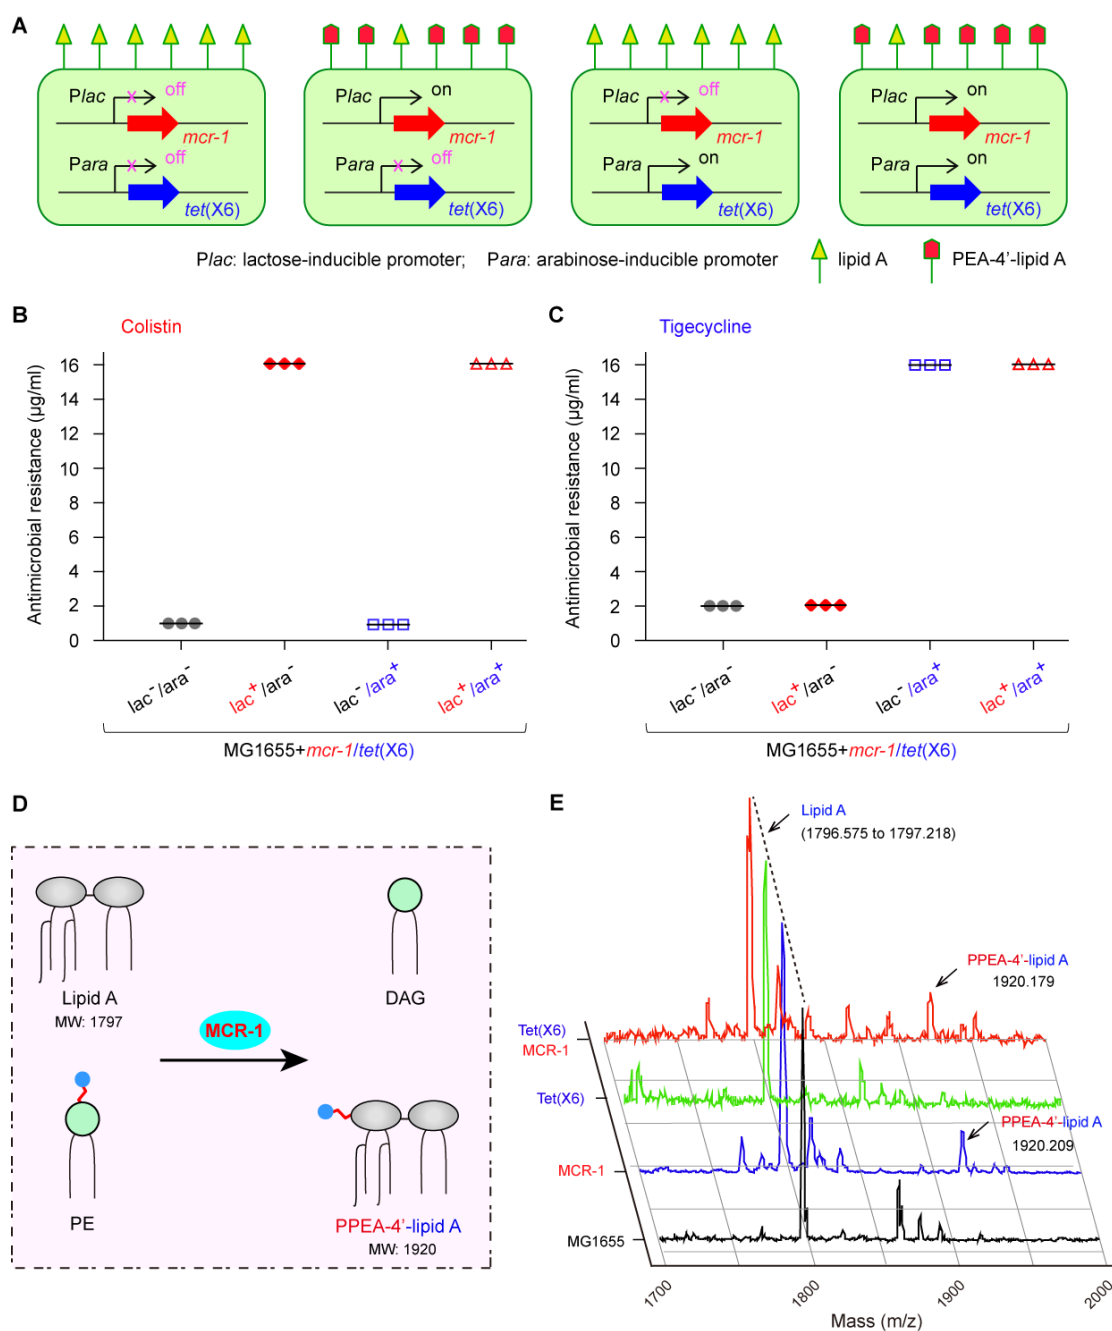

1

2 **Figure 9** No crosstalk between MCR-1 and Tet(X6) in a given *E. coli* strain

3

4 **A.** Schematic representative of an engineered *E. coli* strain co-carrying *mcr-1*  
5 and *tet(X6)* in four different modes of expression

6 A symbol of triangle denotes intact LPS-lipid A, whereas the symbol “” refers to  
7 the PPEA-4'-lipid A, a derivative of lipid A with the addition of PEA moiety.

8

9 **B.** MCR-1 colistin resistance occurs independently of Tet(X6) tigecycline  
9 resistance

10

11 **C.** Tet(X6) tigecycline resistance proceeds independently of MCR-1 colistin  
11 resistance

12

12 **D.** Scheme for remodeling of bacterial lipid A by MCR-1

1 **E.** Structural identification of lipid A species from different strains of *E. coli*  
2 expressing a single *tet(X6)/mcr-1* or both

3

4 The strain tested here denotes FYJ4022 (**Table S1**), which is MG1655  
5 co-harboring pWSK129::*mcr-1* and pBAD24::*tet(X6)*.

6 The assays of susceptibility to colistin and tigecycline were performed with LB  
7 Agar plates with varied levels of antibiotics. The symbol “-” refers to no addition  
8 of arabinose or lactose, whereas “+” denotes addition of arabinose and/or  
9 lactose.

10 **Abbreviations:** PE, Phosphatidylethanolamine; DAG, Diacylglycerol; PPEA,  
11 Phosphoethanolamine; MW, molecular weight.

12

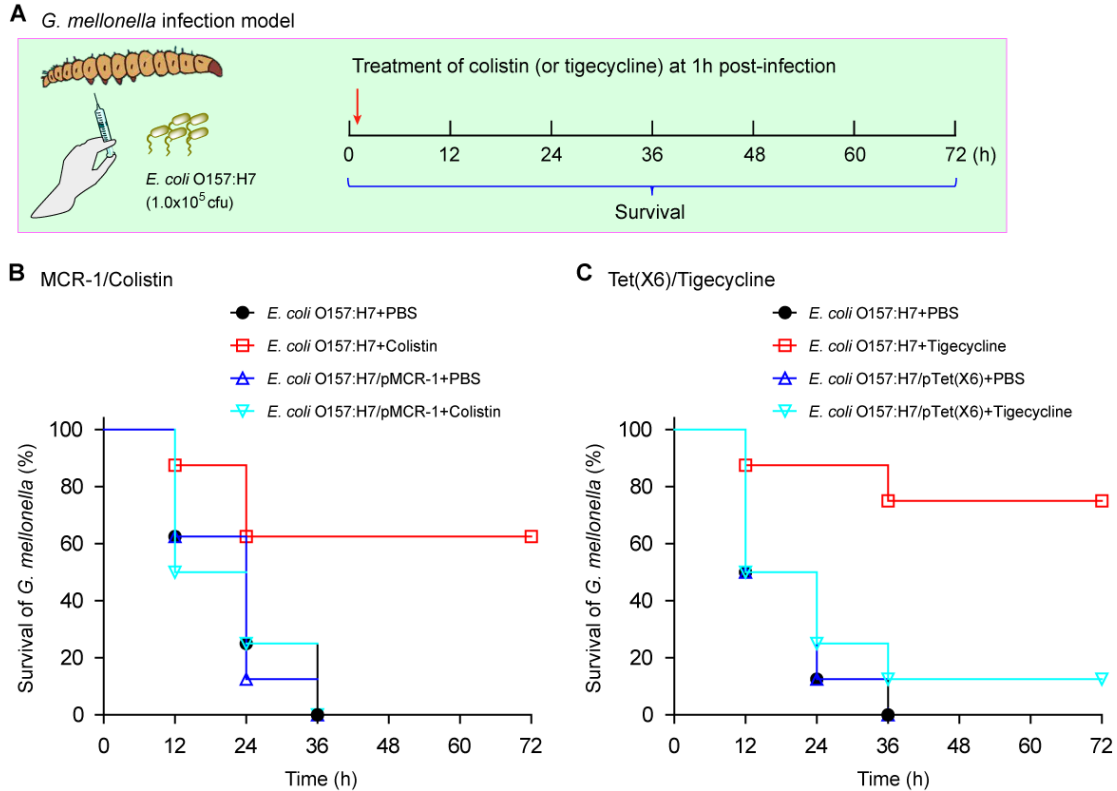

1

2 **Fig. 10** Survival curves of *G. mellonella* suggested that the two treatments of  
 3 both colistin and tigecycline are ineffective for the *E. coli* infections producing  
 4 either MCR-1 or Tet(X6)

5 **A.** Schematic representative for *G. mellonella* infection model

6 **B.** The failure in colistin treatment as for *G. mellonella* infected with  
 7 *mcr-1*-harboring virulent *E. coli*

8 **C.** Tet(X6) renders tigecycline useless in the infection model of *G. mellonella*

9

10 In addition to the virulent strain EDL933 of EHEC O157:H7, the two derivative  
 11 strains were included here (**Table S1**). Namely, they referred to FYJ4039 with  
 12 pWSK129::*Pmcr-1* (panel B) and FYJ4040 harboring pWSK129::*P2tet*(X6)  
 13 (panel C).

14 A representative result is given from three independent assays.

1 **Supporting information**

2

3 **Supporting tables**

4 **Table S1 Bacterial strains and plasmids used in this study**

| Strains/plasmids         | Description                                                                                                               | Origins   |
|--------------------------|---------------------------------------------------------------------------------------------------------------------------|-----------|
| <b>Strains</b>           |                                                                                                                           |           |
| DH5α                     | A cloning host of <i>E. coli</i>                                                                                          | Lab stock |
| MG1655                   | A wild-type strain of <i>E. coli</i> K-12                                                                                 | Lab stock |
| EDL933                   | A virulent strain of <i>E. coli</i> O157:H7                                                                               | Lab stock |
| FYJ796                   | MG1655 carrying pBAD24                                                                                                    | Lab stock |
| FYJ4000                  | MG1655 carrying pBAD24:: <i>tet</i> (X6)                                                                                  | Lab stock |
| FYJ4019                  | MG1655 carrying pBAD24:: <i>tet</i> (X6)                                                                                  | This work |
| FYJ4020                  | MG1655 carrying pBAD24:: <i>tet</i> (X3)                                                                                  | This work |
| FYJ4021                  | MG1655 carrying pWSK129:: <i>mcr-1</i>                                                                                    | This work |
| FYJ4022                  | MG1655 carrying pWSK129:: <i>mcr-1</i> and pBAD24:: <i>tet</i> (X6)                                                       | This work |
| FYJ4023                  | BL21 carrying pET21a:: <i>tet</i> (X6)                                                                                    | This work |
| FYJ4024                  | MG1655 carrying pBAD24:: <i>tet</i> (X6) (E36A)                                                                           | This work |
| FYJ4025                  | MG1655 carrying pBAD24:: <i>tet</i> (X6) (R37A)                                                                           | This work |
| FYJ4026                  | MG1655 carrying pBAD24:: <i>tet</i> (X6) (R107A)                                                                          | This work |
| FYJ4027                  | MG1655 carrying pBAD24:: <i>tet</i> (X6) (Q182A)                                                                          | This work |
| FYJ4028                  | MG1655 carrying pBAD24:: <i>tet</i> (X6) (R203A)                                                                          | This work |
| FYJ4029                  | MG1655 carrying pBAD24:: <i>tet</i> (X6) (H224A)                                                                          | This work |
| FYJ4030                  | MG1655 carrying pBAD24:: <i>tet</i> (X6) (G226A)                                                                          | This work |
| FYJ4031                  | MG1655 carrying pBAD24:: <i>tet</i> (X6) (D301A)                                                                          | This work |
| FYJ4032                  | MG1655 carrying pBAD24:: <i>tet</i> (X6) (P308A)                                                                          | This work |
| FYJ4033                  | MG1655 carrying pBAD24:: <i>tet</i> (X6) (Q312A)                                                                          | This work |
| FYJ4034                  | MG1655 carrying pBAD24:: <i>tet</i> (X6) (M365A)                                                                          | This work |
| FYJ4035                  | BL21 carrying pET21a:: <i>tet</i> (X3)                                                                                    | This work |
| FYJ4036                  | MG1655 carrying pWSK129:: <i>P1 tet</i> (X6)                                                                              | This work |
| FYJ4037                  | MG1655 carrying pWSK129:: <i>P2 tet</i> (X6)                                                                              | This work |
| FYJ4038                  | EDL933 carrying pWSK129                                                                                                   | This work |
| FYJ4039                  | EDL933 carrying pWSK129:: <i>Pmcr-1</i>                                                                                   | This work |
| FYJ4040                  | EDL933 carrying pWSK129:: <i>P2 tet</i> (X6)                                                                              | This work |
| <b>Plasmids</b>          |                                                                                                                           |           |
| pBAD24                   | The arabinose-inducible expression vector, Amp <sup>R</sup>                                                               | Lab stock |
| pWSK129                  | The lactose-activated expression vector, Km <sup>R</sup>                                                                  | Lab stock |
| pHNSHP45-2               | A big <i>mcr-1</i> -bearing plasmid (251,493bp) from the <i>E. coli</i> SH45 strain (acc. no.: <a href="#">KU341381</a> ) | 29        |
| pBAD24:: <i>tet</i> (X4) | A pBAD24 carrying <i>tet</i> (X4) at the two cuts of EcoRI and Sall, Amp <sup>R</sup>                                     | 20        |



|                                 |                                                                                                                                               |           |
|---------------------------------|-----------------------------------------------------------------------------------------------------------------------------------------------|-----------|
| pBAD24:: <i>tet(X6)</i>         | A pBAD24 carrying <i>tet(X6)</i> at the two cuts of EcoRI and Sall, Amp <sup>R</sup>                                                          | This work |
| pBAD24:: <i>tet(X3)</i>         | A pBAD24 carrying <i>tet(X3)</i> at the two cuts of EcoRI and Sall, Amp <sup>R</sup>                                                          | This work |
| pWSK129:: <i>mcr-1</i>          | A pWSK129 carrying <i>mcr-1</i> at the two cuts of Sall and EcoRI, Km <sup>R</sup>                                                            | This work |
| pET21a:: <i>tet(X6)</i>         | A pET21a vector carrying <i>tet(X6)</i> at the two cuts of NdeI and XhoI, Amp <sup>R</sup>                                                    | This work |
| pET21a:: <i>tet(X3)</i>         | A pET21a vector carrying <i>tet(X3)</i> at the two cuts of NdeI and XhoI, Amp <sup>R</sup>                                                    | This work |
| pBAD24:: <i>tet(X6)</i> (E36A)  | A derivative of pBAD24 encoding the point-mutant E36A of <i>tet(X6)</i> , Amp <sup>R</sup>                                                    | This work |
| pBAD24:: <i>tet(X6)</i> (R37A)  | A derivative of pBAD24 encoding the R37A substitution version of <i>tet(X6)</i> , Amp <sup>R</sup>                                            | This work |
| pBAD24:: <i>tet(X6)</i> (R107A) | A derivative of pBAD24 encoding the point-mutant (R107A) of <i>tet(X6)</i> , Amp <sup>R</sup>                                                 | This work |
| pBAD24:: <i>tet(X6)</i> (Q182A) | pBAD24 encoding the Q182A mutant of <i>tet(X6)</i> , Amp <sup>R</sup>                                                                         | This work |
| pBAD24:: <i>tet(X6)</i> (R203A) | pBAD24 encoding the R203A mutant of <i>tet(X6)</i> , Amp <sup>R</sup>                                                                         | This work |
| pBAD24:: <i>tet(X6)</i> (H224A) | pBAD24 encoding the H224A mutant of <i>tet(X6)</i> , Amp <sup>R</sup>                                                                         | This work |
| pBAD24:: <i>tet(X6)</i> (G226A) | pBAD24 encoding the G226A mutant of <i>tet(X6)</i> , Amp <sup>R</sup>                                                                         | This work |
| pBAD24:: <i>tet(X6)</i> (D301A) | pBAD24 encoding the D301A mutant of <i>tet(X6)</i> , Amp <sup>R</sup>                                                                         | This work |
| pBAD24:: <i>tet(X6)</i> (P308A) | pBAD24 encoding the P308A mutant of <i>tet(X6)</i> , Amp <sup>R</sup>                                                                         | This work |
| pBAD24:: <i>tet(X6)</i> (Q312A) | pBAD24 encoding the Q312A mutant of <i>tet(X6)</i> , Amp <sup>R</sup>                                                                         | This work |
| pBAD24:: <i>tet(X6)</i> (M365A) | pBAD24 encoding the M365A mutant of <i>tet(X6)</i> , Amp <sup>R</sup>                                                                         | This work |
| pWSK129:: <i>P1 tet(X6)</i>     | pWSK129 carrying the promoter1-linked <i>tet(X6)</i> at the two cuts of Sall and EcoRI, Km <sup>R</sup>                                       | This work |
| pWSK129:: <i>P1 tet(X6)</i>     | A derivative of pWSK129 carrying the promoter2-fused <i>tet(X6)</i> at the two cuts of Sall and EcoRI, Km <sup>R</sup>                        | This work |
| pWSK129:: <i>Pmcr-1</i>         | A derivative of pWSK129, of which the two cuts of Sall and EcoRI, is inserted by <i>mcr-1</i> along with its native promoter, Km <sup>R</sup> | This work |

1 **Table S2 Primers used in this study**

| Primers                                 | Sequences                                                              |
|-----------------------------------------|------------------------------------------------------------------------|
| pBAD24/ <i>tetX6</i> (EcoRI)-F          | 5'-CGG <u>AAT TCA</u> TGA CCC TAA AAC CAG TAA ACA AGA-3'               |
| pBAD24/ <i>tetX6</i> (Sall)-R           | 5'-ACG <u>CGT CGA</u> CTA GAT TCA TTA GTT TTT GGA ATG AAA AG-3'        |
| pET21/ <i>tetX6</i> (NdeI)F             | 5'-GGA ATT <u>CCA TAT</u> GAT GAC TTT GCT AAA AAA TAA AAA AA-3'        |
| pET21/ <i>tetX6</i> (XhoI)R             | 5'-CCG <u>CTC GAG</u> TAG ATT CAT TAG TTT TTG GAA TGA A-3'             |
| pET21/ <i>tetX3</i> (NdeI)F             | 5'-GGA ATT <u>CCA TAT</u> GAT GAC TTT ACT AAA ATA TAA AAA AA-3'        |
| pET21/ <i>tetX3</i> (XhoI)R             | 5'-CCG <u>CTC GAG</u> TAG ATT CAT TAG TTT TTG GAA CG-3'                |
| pWSK129/MCR-1<br>(Sall)-F               | 5'-ACG <u>CGT CGA</u> CAT GAT GCA GCA TAC TTC TGT GTG G-3'             |
| pWSK129/MCR-1<br>(EcoRI)-R              | 5'-CGG <u>AAT TCA</u> TCA GCG GAT GAA TGC GGT GCG GT-3'                |
| TetX6(E36A)-F                           | 5'-CAG TTT ACg caA GAG ACA AAG ACC GAG ATG CAA G-3'                    |
| TetX6(E36A)-R                           | 5'-GTC TCT tgc GTA AAC TGT AAC GTC CAC GCG GT-3'                       |
| TetX6(R37A)-F                           | 5'-TTA CGA Ggc aGA CAA AGA CCG AGA TGC AAG GA-3'                       |
| TetX6(R37A)-R                           | 5'-CTT TGT Ctg cCT CGT AAA CTG TAA CGT CCA CGC-3'                      |
| TetX6(R107A)-F                          | 5'-AAC gca AAT GAC TTA AGA ACT ATC TTA TTA AAT AGC CTA-3'              |
| TetX6(R107A)-R                          | 5'-CTT AAG TCA TTt gcG TTT ATT TCA GGA TTG TCA AAC CG-3'               |
| TetX6(Q182A)-F                          | 5'-Agc aGC CGA TAT TCA TCA ACC AGA GGT GAA CT-3'                       |
| TetX6(Q182A)-R                          | 5'-GAT GAA TAT CGG Ctg cTA TAT TGA AAG TAC CTG TTT CTT CAA CTT<br>C-3' |
| TetX6(R203A)-F                          | 5'-TGG AAA Cgc aCT AAT GGC TGC TCA TCA AGG TAA T-3'                    |
| TetX6(R203A)-R                          | 5'-CCA TTA Gtg cGT TTC CAT TGC ATA GCT GAA AAA A-3'                    |
| TetX6(H224A)-F                          | 5'-GTG CAT TGg caT TTG GAA TAA GTT TTA AAA CAC CTG AT-3'               |
| TetX6(H224A)-R                          | 5'-TCC AAA tgc CAA TGC ACC ATT ATT ATT AGG ATT CG-3'                   |
| TetX6(G226A)-F                          | 5'-GTG CAT TGC ATT TTg caA TAA GTT TTA AAA CAT CTG ATG AAT<br>GGA-3'   |
| TetX6(G226A)-R                          | 5'-tgc AAA ATG CAA TGC ACC ATT ATT ATT AGG AT-3'                       |
| TetX6(D301A)-F                          | 5'-TGA TTG Gag caG CTG CTC ATT TGA TGC CTC CT-3'                       |
| TetX6(D301A)-R                          | 5'-AGC AGC tgc TCC AAT CAT CGT TAT GGG TAA TGG-3'                      |
| TetX6(P308A)-F                          | 5'-GAT GCC Tgc aTT TGC AGG ACA AGG CGT AAA CA-3'                       |
| TetX6(P308A)-R                          | 5'-CTG CAA Atg cAG GCA TCA AAT GAG CAG CAT CT-3'                       |
| TetX6(Q312A)-F                          | 5'-AGG Agc aGG CGT AAA CAG CGG GTT GAT GGA TG-3'                       |
| TetX6(Q312A)-R                          | 5'-TGT TTA CGC Ctg cTC CTG CAA AAG GAG GCA TCA-3'                      |
| TetX6(M365A)-F                          | 5'-ACG GAA gca TTC AGT TCC GAC TTT TCA TTC CA-3'                       |
| TetX6(M365A)-R                          | 5'-GAA CTG AAt gcT TCC GTT TCG TTT ATT ATT GAT TCT G-3'                |
| pWSK129-P1 <i>tet</i> (X6)-F<br>(Sall)  | 5'-ACG <u>CGT CGA</u> CGA GCC TTG CGG CGG AAC TT-3'                    |
| pWSK129-P1 <i>tet</i> (X6)-R<br>(EcoRI) | 5'-CCG <u>GAA TTC</u> TTA TAG ATT CAT TAG TTT TTG GAA TGA AAA G-3'     |
| P2 <i>tet</i> (X6)-F                    | 5'-CCC TAA AAC CAG TAA ACA AGA ATA TGA CTT TGC TAA AAA ATA<br>AAA-3'   |

|                                      |                                                                                           |
|--------------------------------------|-------------------------------------------------------------------------------------------|
| P2 <i>tet</i> (X6)-R                 | 5'-TTT TAT TTT TTA GCA AAG TCA TAT TCT TGT TTA CTG GTT TTA<br>GGG-3'                      |
| pWSK129-P2 <i>tet</i> (X6)<br>(Sall) | 5'-ACG <u><i>CGT CGA CCG</i></u> CAG CGG TGG TAA CGG CGC AGT GGC GGT<br>TTT CAT GGC TT-3' |
| P2 <i>tet</i> (X6)-F                 | 5'-GTT ACG CCG TGG GTC GAT GTT TGA TGA CTT TGC TAA AAA ATA<br>AAA-3'                      |
| P2 <i>tet</i> (X6)-R                 | 5'-TTT TAT TTT TTA GCA AAG TCA TCA AAC ATC GAC CCA CGG CGT<br>AAC-3'                      |

---

- 1 The underlined letters in italic refer to the sites of restriction enzyme, and
- 2 lowercase letters denote codons used to the site-directed alanine substitution.

## 1 Supporting figures

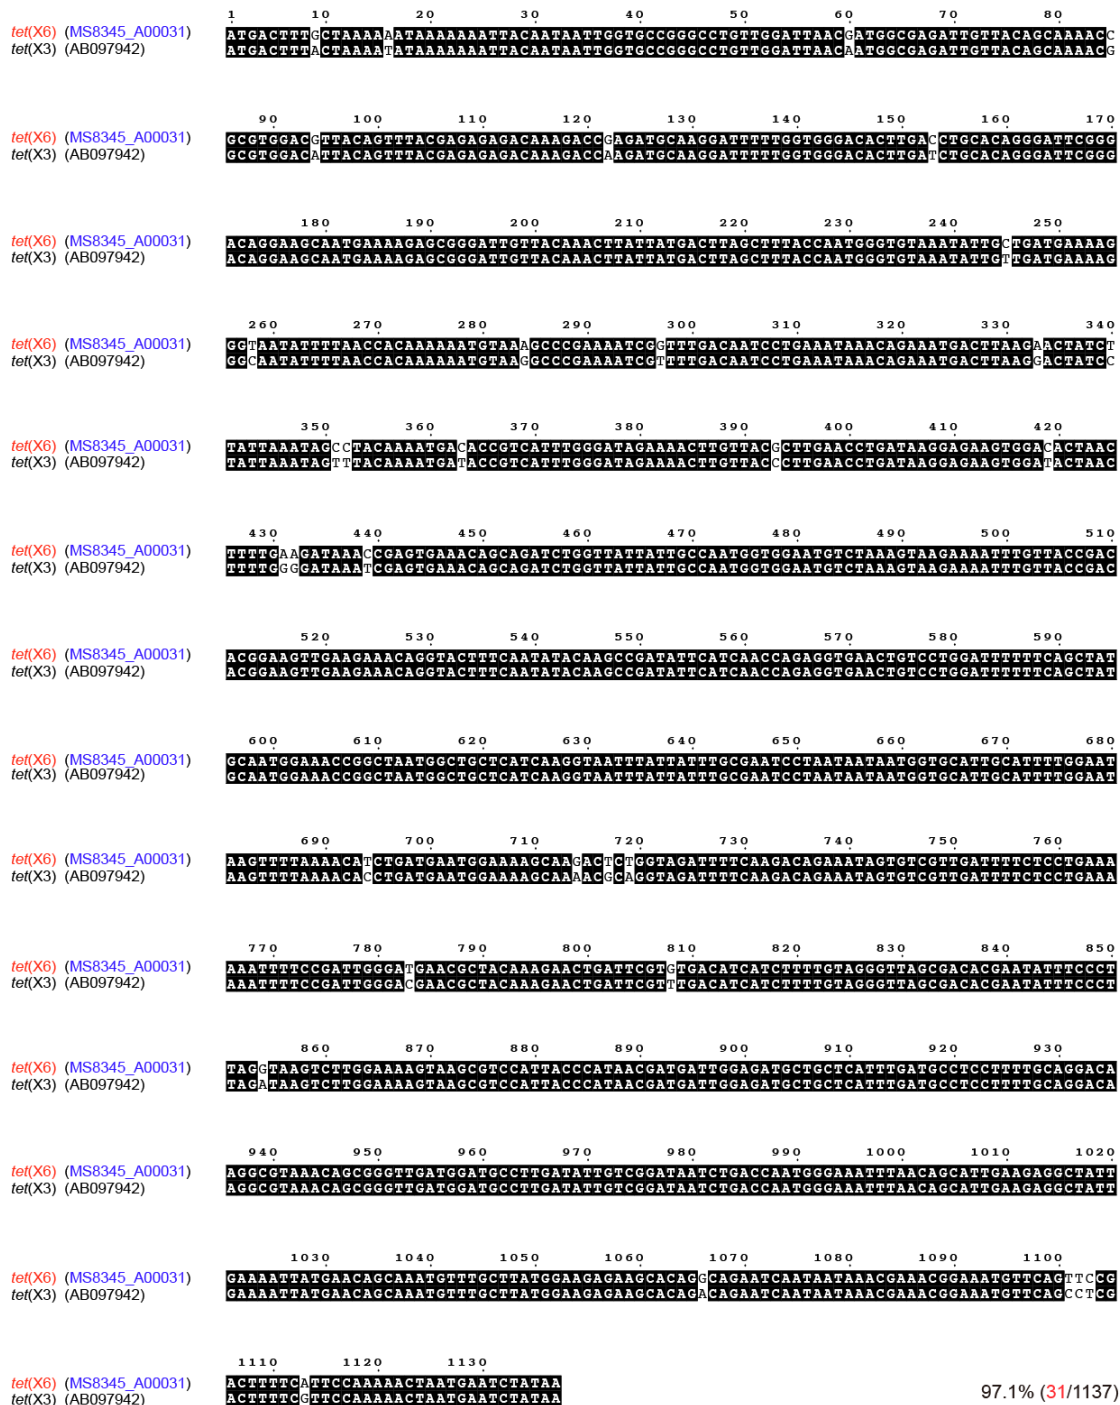

2

## 3 Fig. S1 Nucleotide acid sequence analysis of *tet(X3)* and *tet(X6)*

4 To determine the similarity between *tet(X3)* and *tet(X6)*, their nucleotide acid

5 sequences were subjected to Clustal Omega

6 (<https://www.ebi.ac.uk/Tools/msa/clustalo/>), and resultant form of sequence is

7 given with ESPrnt 3.0 (<http://esprnt.ibcp.fr/ESPrnt/cgi-bin/ESPrnt.cgi>).

8 Identical residues are in white letters with black background, and different

9 residues are black letters with white background. The identity between *tet(X3)*

10 and *tet(X6)* is 97.1%, with 31 substitution of 1137 residues in total.

```
650      660      670      680      690      700      710      720      730      740
TG_7F_Contig_3 (Acc. no. KU547185) ATGGTTGCAGACCTCGACGATAATATATGTTTTGAAAACATTCAAAATAATGAGACCAAGTTATCGCTGAAAGGATTACAGCGTTTAAACAACA
TE_7F_Contig_3 (Acc. no. KU547176) ATGGTTGCAGACCTCGACGATAATATGTTTTGAAAACATTCAAAATAATGAGACCAAGTTATCGCTGAAAGGATTACAGCGTTTAAACAACA
MS8345 (Acc. no. NZ_CP025402) .....

750      760      770      780      790      800      810      820      830
GGCAGAAACAGCAAAAACATACTTTACAAAAGAACCGAGGTTAAATCGTTAAGCATTTCGACACAGCAGCGAAATGAGATTGATTATA
GGCAGAAACAGCAAAAACATACTTTACAAAAGAACCGAGGTTAAATCGTTAAGCATTTCGACACAGCAGCGAAATGAGATTGATTATA
.....

840      850      860      870      880      890      900      910      920      930
CAGCTATTTAGCAATGATTTCCCGAACGGCTTAAAAGGGCAAGAGCTAAAACCTTATCAGGAAAATCCGGTGTGAATTTAAAAAAAATAA
CAGCTATTTAGCAATGATTTCCCGAACGGCTTAAAAGGGCAAGAGCTAAAACCTTATCAGGAAAATCCGGTGTGAATTTAAAAAAAATAA
.....

940      950      960      970      980      990      1000      1010      1020
GTGATTAATGACAGACATCAGCTGACCTAAAACAGTAAACAAGAATATGACTTGTCTAAAAAATAAAAAATACAAATATTTGGTGGCGGG
GTGATTAATGACAGACATCAGCTGACCTAAAACAGTAAACAAGAATATGACTTGTCTAAAAAATAAAAAATACAAATATTTGGTGGCGGG
.....

1030      1040      1050      1060      1070      1080      1090      1100      1110      1120
CCGTGTGATTAACGATGGCGAGATTGTTACAGCAAAAACCGGGTGGACCTTACAGTTTACGAGAGAGACAAAGACCGGAGATGCAAGGATTTTGG
CCGTGTGATTAACGATGGCGAGATTGTTACAGCAAAAACCGGGTGGACCTTACAGTTTACGAGAGAGACAAAGACCGGAGATGCAAGGATTTTGG
CCGTGTGATTAACGATGGCGAGATTGTTACAGCAAAAACCGGGTGGACCTTACAGTTTACGAGAGAGACAAAGACCGGAGATGCAAGGATTTTGG
.....

1130      1140      1150      1160      1170      1180      1190      1200
TGGGACACTGACCTGCACAGGGATTTCGGGACAGGAAGCAATGAAAAGAGCGGGATTTGTACAACTTATATGACTTAGCTTACCAATGGGTG
TGGGACACTGACCTGCACAGGGATTTCGGGACAGGAAGCAATGAAAAGAGCGGGATTTGTACAACTTATATGACTTAGCTTACCAATGGGTG
TGGGACACTGACCTGCACAGGGATTTCGGGACAGGAAGCAATGAAAAGAGCGGGATTTGTACAACTTATATGACTTAGCTTACCAATGGGTG
.....

1220      1230      1240      1250      1260      1270      1280      1290      1300      1310
TAAATATGCTGATGAAAAGGGTAATATTTAACCCAAAAAATGAAAAGCCGAAAATCGGTTGACAACTCCGAAAATAAACAGAAATGACTTA
TAAATATGCTGATGAAAAGGGTAATATTTAACCCAAAAAATGAAAAGCCGAAAATCGGTTGACAACTCCGAAAATAAACAGAAATGACTTA
TAAATATGCTGATGAAAAGGGTAATATTTAACCCAAAAAATGAAAAGCCGAAAATCGGTTGACAACTCCGAAAATAAACAGAAATGACTTA
.....

1320      1330      1340      1350      1360      1370      1380      1390      1400
AGAACTATCTTAAATAGCCACAAAATGACACCGCTCATTTGGGATAGAAAATCTGTTAGCTTGAACCTGATATAGGAGAAGTGGACATAAC
AGAACTATCTTAAATAGCCACAAAATGACACCGCTCATTTGGGATAGAAAATCTGTTAGCTTGAACCTGATATAGGAGAAGTGGACATAAC
AGAACTATCTTAAATAGCCACAAAATGACACCGCTCATTTGGGATAGAAAATCTGTTAGCTTGAACCTGATATAGGAGAAGTGGACATAAC
.....

1410      1420      1430      1440      1450      1460      1470      1480      1490      1500
TTTGAAGATAAACCGAGTGAACAGCAGATCTGGTATATTTGCCAATGGTGAATGCTCAAAGTAAAGAAATTTGTACCGACAGCGAAAGTTG
TTTGAAGATAAACCGAGTGAACAGCAGATCTGGTATATTTGCCAATGGTGAATGCTCAAAGTAAAGAAATTTGTACCGACAGCGAAAGTTG
TTTGAAGATAAACCGAGTGAACAGCAGATCTGGTATATTTGCCAATGGTGAATGCTCAAAGTAAAGAAATTTGTACCGACAGCGAAAGTTG
.....

1510      1520      1530      1540      1550      1560      1570      1580      1590
AAGAAACAGGTAATTTCAATATACAAGCCGATATTCATCAACAGAGGTAAGTCTGCTGGATTTTTCAGGTATGCAATGAAAACCGGCTAATG
AAGAAACAGGTAATTTCAATATACAAGCCGATATTCATCAACAGAGGTAAGTCTGCTGGATTTTTCAGGTATGCAATGAAAACCGGCTAATG
AAGAAACAGGTAATTTCAATATACAAGCCGATATTCATCAACAGAGGTAAGTCTGCTGGATTTTTCAGGTATGCAATGAAAACCGGCTAATG
.....

1600      1610      1620      1630      1640      1650      1660      1670      1680      1690
CGTGCATCAAGGTAATTTATTTGCGAATCCATAATAATGTTGCAATGCTGCAATTTTGGAAATAGTTTAAACACCTCTGATGATGAAAAG
CGTGCATCAAGGTAATTTATTTGCGAATCCATAATAATGTTGCAATGCTGCAATTTTGGAAATAGTTTAAACACCTCTGATGATGAAAAG
CGTGCATCAAGGTAATTTATTTGCGAATCCATAATAATGTTGCAATGCTGCAATTTTGGAAATAGTTTAAACACCTCTGATGATGAAAAG
.....

1700      1710      1720      1730      1740      1750      1760      1770      1780
CAAGCTCTGGTAGATTTTCAAGACAGAAATAGTGTGCTGATTTTCTCCTGAAAATAATTTCCGATTTGGATGAAAGGTAAGTAAAGCAACTGATTC
CAAGCTCTGGTAGATTTTCAAGACAGAAATAGTGTGCTGATTTTCTCCTGAAAATAATTTCCGATTTGGATGAAAGGTAAGTAAAGCAACTGATTC
CAAGCTCTGGTAGATTTTCAAGACAGAAATAGTGTGCTGATTTTCTCCTGAAAATAATTTCCGATTTGGATGAAAGGTAAGTAAAGCAACTGATTC
.....

1790      1800      1810      1820      1830      1840      1850      1860      1870      1880
GTGTGACATCACTTTTGTAGGGTTAGGGACAGGAATATTCCTTAGGTAAGTCTGAAAAGTAAAGGTCATACCCATAACGATGATTTGGA
GTGTGACATCACTTTTGTAGGGTTAGGGACAGGAATATTCCTTAGGTAAGTCTGAAAAGTAAAGGTCATACCCATAACGATGATTTGGA
GTGTGACATCACTTTTGTAGGGTTAGGGACAGGAATATTCCTTAGGTAAGTCTGAAAAGTAAAGGTCATACCCATAACGATGATTTGGA
.....

1890      1900      1910      1920      1930      1940      1950      1960      1970
GATGCTGCTCATTGATGCTCCTTTGCGAGGCAAGGGTAAACAGCGGGTGTATGATGCTGATATTTGTTGGATTAATCTGACCAATGGGAA
GATGCTGCTCATTGATGCTCCTTTGCGAGGCAAGGGTAAACAGCGGGTGTATGATGCTGATATTTGTTGGATTAATCTGACCAATGGGAA
GATGCTGCTCATTGATGCTCCTTTGCGAGGCAAGGGTAAACAGCGGGTGTATGATGCTGATATTTGTTGGATTAATCTGACCAATGGGAA
.....

1980      1990      2000      2010      2020      2030      2040      2050      2060      2070
ATTTAACAGCATTGAAGGGGATTTGAAAATATGAAAGCAGCAATGTTGCTTATGGAAGAGAAAGCAGCGGCAATCAATTAATAACGAAAACGG
ATTTAACAGCATTGAAGGGGATTTGAAAATATGAAAGCAGCAATGTTGCTTATGGAAGAGAAAGCAGCGGCAATCAATTAATAACGAAAACGG
ATTTAACAGCATTGAAGGGGATTTGAAAATATGAAAGCAGCAATGTTGCTTATGGAAGAGAAAGCAGCGGCAATCAATTAATAACGAAAACGG
.....

2080      2090      2100      2110      2120      2130      2140      2150      2160
AAATGTTCAAGTCCGACTTTTCATTCGAAAACCTAATGAATCTATAAAAACAGAAAGCGGAGTAAATGAAAAGAGAAAATAGTTAAAACGAACTAAC
AAATGTTCAAGTCCGACTTTTCATTCGAAAACCTAATGAATCTATAAAAACAGAAAGCGGAGTAAATGAAAAGAGAAAATAGTTAAAACGAACTAAC
AAATGTTCAAGTCCGACTTTTCATTCGAAAACCTAATGAATCTATAAAAACAGAAAGCGGAGTAAATGAAAAGAGAAAATAGTTAAAACGAACTAAC
.....

2170      2180      2190      2200      2210      2220      2230      2240      2250      2260
AAAAATGCTATTTTCAATTAATCATATATCTCAGAGTACAGCGAAAAGAAAATGCGAATTTCCGCTGCTATAAGCCCTACACAAATGGGA
AAAAATGCTATTTTCAATTAATCATATATCTCAGAGTACAGCGAAAAGAAAATGCGAATTTCCGCTGCTATAAGCCCTACACAAATGGGA
AAAAATGCTATTTTCAATTAATCATATATCTCAGAGTACAGCGAAAAGAAAATGCGAATTTCCGCTGCTATAAGCCCTACACAAATGGGA
.....

2270      2280      2290      2300      2310      2320      2330      2340      2350
GATATATCATGAAAGGCTGGCTTTTCTGTTATCGCAATAGTTGGCGAAGTAATCGCAACATCCGCATTAATAATCTAGCGAGGGCTTTACTAAG
GATATATCATGAAAGGCTGGCTTTTCTGTTATCGCAATAGTTGGCGAAGTAATCGCAACATCCGCATTAATAATCTAGCGAGGGCTTTACTAAG
GATATATCATGAAAGGCTGGCTTTTCTGTTATCGCAATAGTTGGCGAAGTAATCGCAACATCCGCATTAATAATCTAGCGAGGGCTTTACTAAG
.....

2360      2370      2380      2390      2400      2410      2420      2430      2440      2450
CTGCCCCCTCCGCCCTGTCATAATCGGTTATGCGATCGATTTTCTTCTCTGGTTCGAAATCCACCTCTGCGGTTGCTGCTATGCT
CTGCCCCCTCCGCCCTGTCATAATCGGTTATGCGATCGATTTTCTTCTCTGGTTCGAAATCCACCTCTGCGGTTGCTGCTATGCT
CTGCCCCCTCCGCCCTGTCATAATCGGTTATGCGATCGATTTTCTTCTCTGGTTCGAAATCCACCTCTGCGGTTGCTGCTATGCT
.....

2460      2470      2480      2490      2500      2510      2520      2530      2540
AGTCTGGTCCGGACTCGCGCTCGTCATAAATACAGCCATGCTGCTGCTCATGGGCAAAAAGCTTGATGCTGGGGCTTTGAGGTATGGGGC
AGTCTGGTCCGGACTCGCGCTCGTCATAAATACAGCCATGCTGCTGCTCATGGGCAAAAAGCTTGATGCTGGGGCTTTGAGGTATGGGGC
AGTCTGGTCCGGACTCGCGCTCGTCATAAATACAGCCATGCTGCTGCTCATGGGCAAAAAGCTTGATGCTGGGGCTTTGAGGTATGGGGC
.....

2550      2560      2570
TCATAATGCTGCTTTTGGACGGT
TCATAATGCTGCTTTTGGAC...
.....
```

- 1
- 2
- 3
- 4
- 5
- 6

**Fig. S2** Evidence that an intact *tet(X6)* is only harbored on one plasmid and two contigs

Sequence alignment was conducted as described in **Fig. S1**.

An initial codon “ATG” and the stop codon “TAA” are underlined.



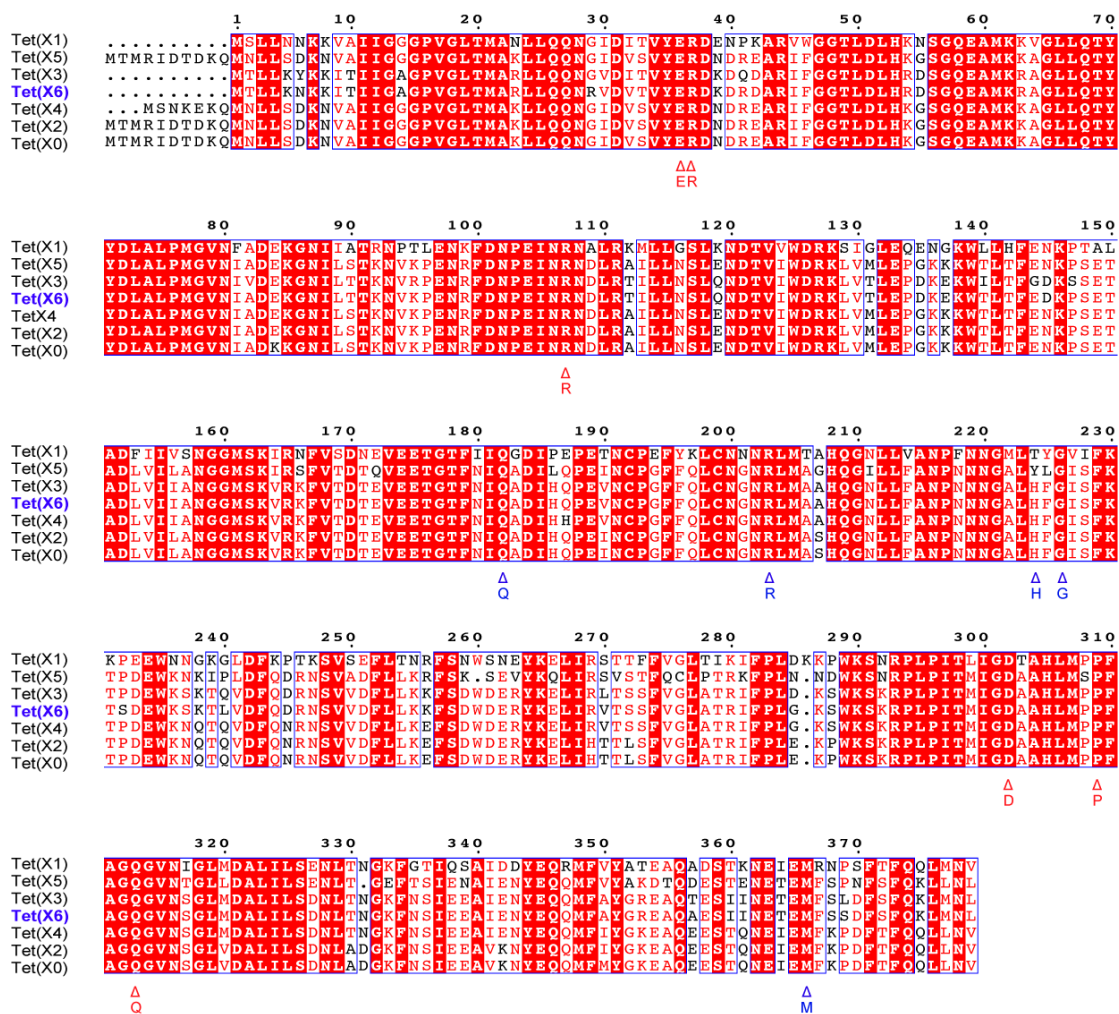

1  
2  
3  
4  
5  
6  
7  
8  
9

**Fig. S3** Sequence alignment of the Tet(X6) enzyme with other five homologs (X0 to X5)

Multiple sequence alignment was conducted with Clustal Omega (<https://www.ebi.ac.uk/Tools/msa/clustalo/>), generating its output with ESPript 3.0 (<http://esprict.ibcp.fr/ESPript/cgi-bin/ESPript.cgi>). The putative substrate-loading cavity is composed of FAD-interactive residues (with red triangles) and Tigecycline-binding residues (with blue triangles).



**A** *Tet(X6)* tigecycline resistance

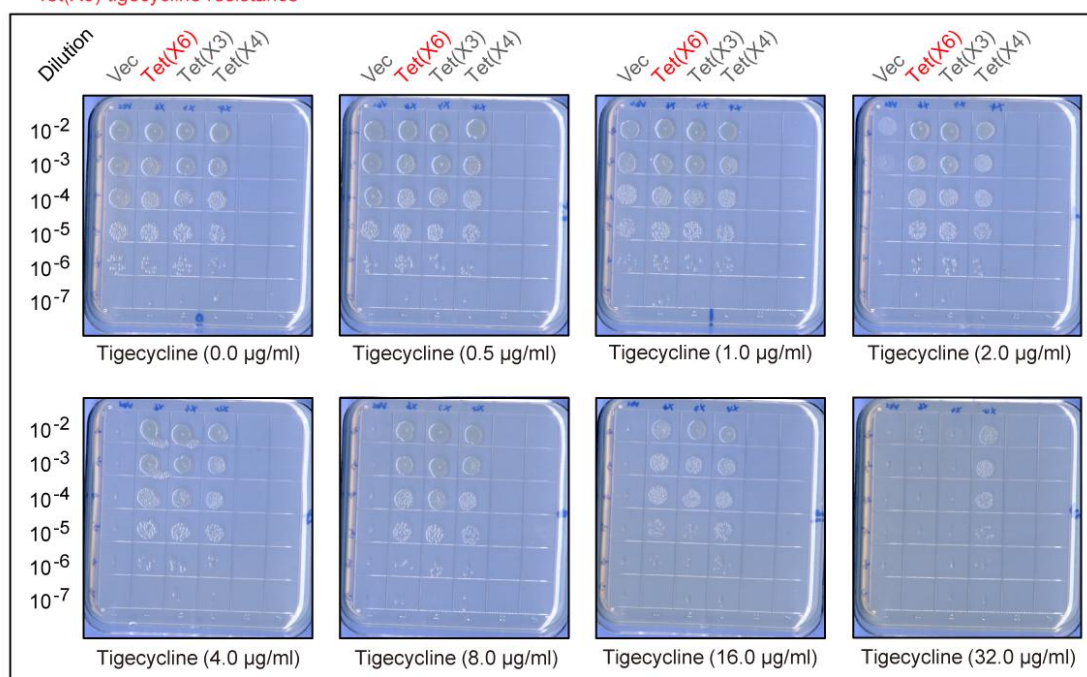

**B** *MCR-1* colistin resistance

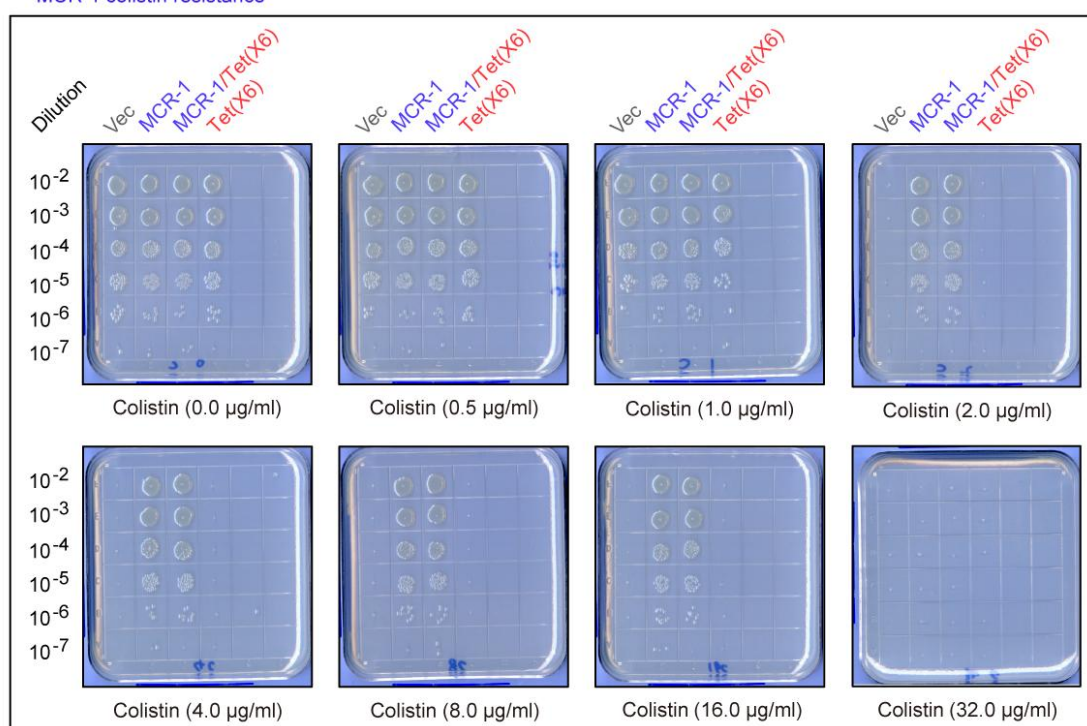

1  
2  
3  
4  
5  
6

**Fig. S4** Co-occurrence of *tet(X6)* and *mcr-1* gives co-resistance to colistin and tigecycline

**A.** Contrasting the level of tigecycline resistance by Tet(X) variants

1 The *E. coli* MG1655 carrying different variants of *tet(X)* [X3, X4, and X6] were  
2 maintained at 37°C on LB agar plates containing tigecycline in series of  
3 dilution.

4 **B.** The MCR-1 confers phenotypic colistin resistance in the *E. coli* MG1655

5

6 The derivatives of *E. coli* MG1655 bear *mcr-1* or *tet(X6)* alone (or both) were  
7 spotted on LB agar plates containing colistin in series of dilution, and  
8 maintained at 37°C for overnight.

9

**A**

```
>Tet(X3) (378aa)
MTLLKYKKITIIGAGPVGLTMARLLQQNGVDITVYERDKDQDARIFGGTL
DLHRDSGQEAMKRAGLLQTYDLALPMGVNIVDEKGNILTTKNVRPENRF
DNPEINRNDLRTILLNSLQNDTVIWDRKLVTLEPDKEKWILTFGDKSSET
ADLVIIANGGMSKVRKFVTDTEVEETGTFNIQADIHQPEVNCPGFFQLCN
GNRLMAAHQGNLLFANPNNGALHFGISFKTPDEWKSKTQVDFQDRNSVV
DFLLKKFSDWDERYKELIRLTSSFVGLATRIFPLDKSWKSKRPLPITMIG
DAAHLMPPFAGQGVNSGLMDALILSDNLTNGKFNSIEEAIENYEQQMFAY
GREAQTESIINETEMFSLDFSFQKLMNL
```

58.5% Coverage

**B**

```
>Tet(X6) (378aa)
MTLLKNKKITIIGAGPVGLTMARLLQQNRVDVTVYERDKDRDARIFGGTL
DLHRDSGQEAMKRAGLLQTYDLALPMGVNIADEKGNILTTKNVKPENRF
DNPEINRNDLRTILLNSLQNDTVIWDRKLVTLEPDKEKWWLTFEDKPSET
ADLVIIANGGMSKVRKFVTDTEVEETGTFNIQADIHQPEVNCPGFFQLCN
GNRLMAAHQGNLLFANPNNGALHFGISFKTSDEWKSKTLVDFQDRNSVV
DFLLKKFSDWDERYKELIRVTSSFVGLATRIFPLGKSWKSKRPLPITMIG
DAAHLMPPFAGQGVNSGLMDALILSDNLTNGKFNSIEEAIENYEQQMFAY
GREAQAESIINETEMFSSDFSFQKLMNL
```

66.4% Coverage

1  
2

3 **Fig. S5** MS identity of the purified two proteins Tet(X3) and Tet(X6)

4 **A.** MS-based identification of polypeptide fragments from the purified Tet(X3)  
5 protein

6 **B.** MS-based determination of the purified Tet(X6) protein

7 The underlined letters denote the polypeptides that match Tet(X3) [and/or  
8 Tet(X6)] protein.

1

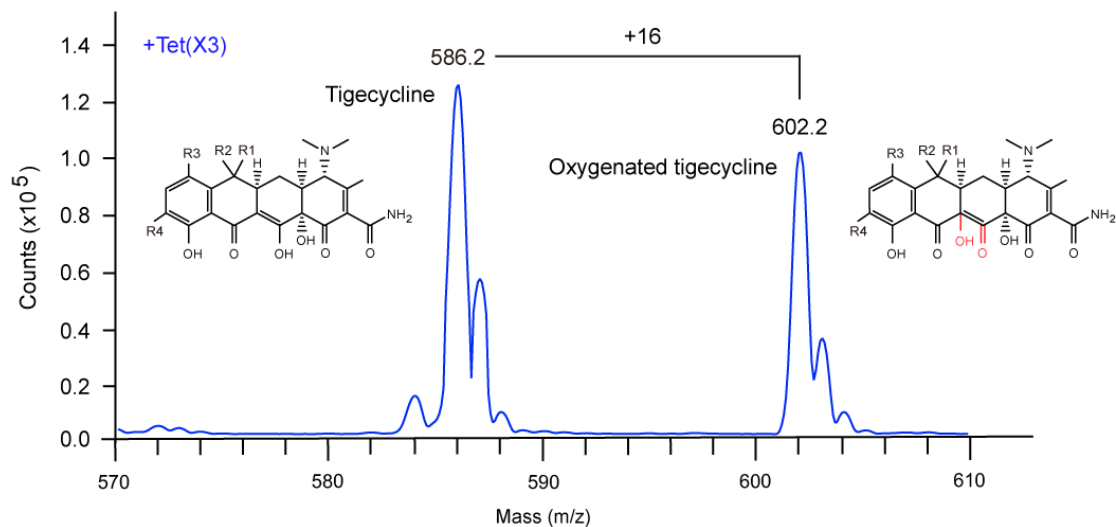

2

3

**Fig. S6 Use of LC/MS to identify the oxygenated product of tigecycline by Tet(X3) enzyme**

4

5

In the spectrum, the peak of 586.2 (m/z) refers to tigecycline, whereas the other peak of 602.2 (m/z) denotes an oxygenated product of tigecycline.

6

7

Chemical structures were given with ChemDraw.

8

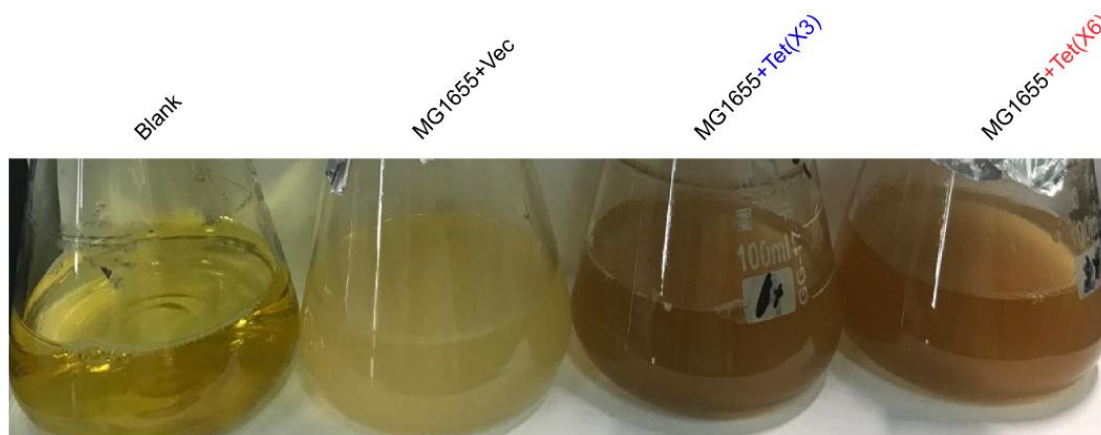

LB, tetracycline (100µg/ml); 24hrs

1  
2

3 **Fig. S7 Visualization for destruction of tetracycline by Tet(X3) [and Tet(X6)]**  
4 **enzyme**

5 Unlike the fact that the blank and the negative control (liquid culture of *E. coli*  
6 with empty vector alone) display yellow, bacterial culture of Tet(X3) [and/or  
7 Tet(X6)]-expressing *E. coli* gives dark. This indicates that the expression of  
8 Tet(X3) [and Tet(X6)] leads to the oxygenation of tetracycline, which is fully  
9 consistent with the observation of other tetracycline-inactivating enzymes by  
10 Forsberg and coworkers<sup>17</sup>.

11 0.1% arabinose is used to induce the expression of pBAD24-borne *tet(X3)*  
12 [and *tet(X6)*].

13 **Designation:** Blank, the LB liquid medium containing tetracycline; Vec,  
14 pBAD24

15

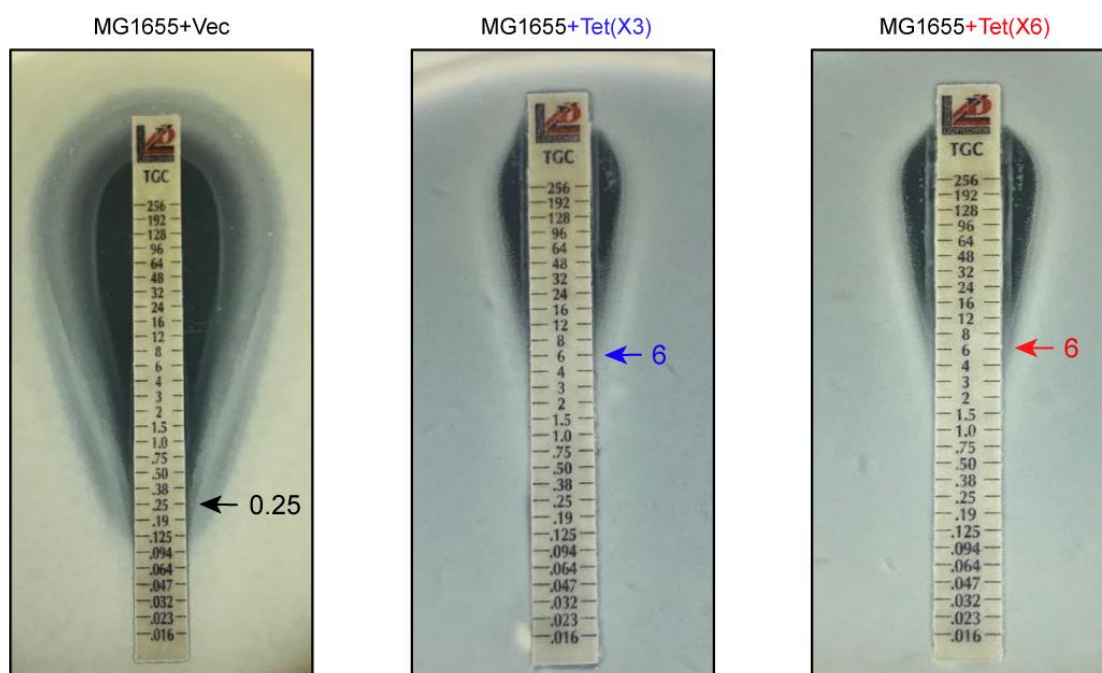

1  
2

3 **Fig. S8** Use of E-test to evaluate phenotypic growth of MG1655 strains  
4 expressing either *tet(X3)* or *tet(X6)*  
5 Semi-solid medium was poured, which was supplemented with the MG1655  
6 strains with the empty vector alone, or the plasmid-borne *tet(X3)* [and/or  
7 *tet(X6)*], accordingly. E-test strip is featuring with a gradient concentration of  
8 tigecycline. The cut-off value of tigecycline resistance is indicated with an  
9 arrow. A representative result of three independent experiments is given.
